# Supplementary material for: Modified nucleoside triphosphates exist in mammals
Source: PubMed Central journal article supplement — Chem Sci. 2018 Apr 2;9(17):4160–7. doi: 10.1039/c7sc05472f (PMC5941283; doi:10.1039/c7sc05472f), 2018-04-02
Supplement: SC-009-C7SC05472F-s001.pdf [file SC-009-C7SC05472F-s001.pdf]

Supporting Information

for

**Modified Nucleoside Triphosphates Exist in Mammals**

Han-Peng Jiang,<sup>†</sup> Jun Xiong,<sup>†</sup> Fei-Long Liu, Cheng-Jie Ma, Xing-Lin Tang, Bi-Feng Yuan,\*

Yu-Qi Feng

Key Laboratory of Analytical Chemistry for Biology and Medicine (Ministry of Education),  
Department of Chemistry, Wuhan University, Wuhan 430072, China.

<sup>†</sup> These authors contributed equally to this work.

\* To whom correspondence should be addressed. Tel. +86-27-68755595; fax. +86-27-68755595. E-mail address: bfyuan@whu.edu.cn

## Method Validation

To construct the calibration curves, a mixture of NTP standards at concentrations between 10 and 2500 fmol/ $\mu$ L and fixed amounts of isotope internal standards ( $^{13}\text{C}_{10},^{15}\text{N}_5$ -ATP for the ribonucleotides and  $^{13}\text{C}_{10},^{15}\text{N}_5$ -dATP for the 2'-deoxyribonucleotides, 20 fmol/ $\mu$ L for each) was prepared. The calibration curves of NTPs were constructed in cellular extraction matrix. A cellular extract without adding the mixture of NTP standards was used as the background. The mixture was labeled by 8-DMQ and then analyzed by LC-ESI-MS/MS. So the calibration curves were generated by plotting the peak area ratios (analytes/IS) against the NTPs concentrations after deduction of background with triplicate measurements. The results showed that good linearities were obtained with the coefficient of determination ( $R^2$ ) being great than 0.9909 (Table S5 in Supporting Information). The limits of detection (LODs) were much better than the LODs obtained by the previously established methods (Table S3 in Supporting Information).

In addition, the precision and accuracy of established method were evaluated by comparing the measured contents of NTPs standards to the theoretical contents of NTPs. The intra- and inter-day relative standard deviations (RSDs) were calculated with different amounts of NTPs standards spiked in cell extraction mixture. Three measurements over a day gave the intra-day RSDs, and the inter-day RSDs were determined by measuring samples for three consecutive days. The results showed that the intra- and inter-day RSDs for NTPs were less than 14.9%, and relative errors (REs) were less than 14.0% (Table S6 in Supporting Information), indicating good precision and accuracy were achieved. Taken together, the results demonstrated that the developed method was reliable for the quantification of NTPs.

## Evaluation of the stable isotope labeling efficiency by $\text{D}_3$ -Met

Human 293T cells were cultured in the methionine-free DMEM-KO medium with the added stable isotope labeled methionine,  $\text{D}_3$ -Met, to metabolically label the DNA and RNA

with CD<sub>3</sub> group. Cells were collected after 48 h culturing and genomic DNA and total RNA were then extracted and enzymatically digested into nucleosides to quantify the stable isotope forms of nucleosides (Figure S9 in Supporting Information). The results showed that 7 kinds of nucleosides and the corresponding CD<sub>3</sub>-labeled nucleosides, including CD<sub>3</sub>-m<sup>1</sup>A, CD<sub>3</sub>-m<sup>6</sup>A, CD<sub>3</sub>-Am, CD<sub>3</sub>-Gm, CD<sub>3</sub>-m<sup>1</sup>G, CD<sub>3</sub>-5-mC and CD<sub>3</sub>-5-mdC, were clearly detected. With the measured contents of the stable isotope as well as the non-isotope forms of these methylated nucleosides, the stable isotope labeling efficiencies were calculated to be between 78% and 97% (Figure S12 in Supporting Information), indicating good stable isotope labeling of DNA and RNA.

**Table S1.** Nucleosides triphosphate standards.

|                                                                 | Abbreviation                  | Company       | Catalog No.     | [M+H] <sup>+</sup> | Product ion |
|-----------------------------------------------------------------|-------------------------------|---------------|-----------------|--------------------|-------------|
| <i>N</i> <sup>4</sup> -Methyl-2'-deoxycytidine-5'-triphosphate  | <i>N</i> <sup>4</sup> -medCTP | Trilink       | N-2057          | 482.0125           | 126.0662    |
| <i>N</i> <sup>6</sup> -Methyl-2'-deoxyadenosine-5'-triphosphate | <i>N</i> <sup>6</sup> -medATP | Trilink       | N-2025          | 506.0238           | 150.0774    |
| 5-Methyl-2'-deoxycytidine-5'-triphosphate                       | 5-medCTP                      | Trilink       | N-2026          | 482.0125           | 126.0662    |
| 5-Hydroxymethyl-2'-deoxycytidine-5'-triphosphate                | 5-hmdCTP                      | Trilink       | N-2060          | 498.0074           | 142.0611    |
| 5-Formyl-2'-deoxycytidine-5'-triphosphate                       | 5-fodCTP                      | Trilink       | N-2064          | 495.9918           | 140.0455    |
| 5-Carboxy-2'-deoxycytidine-5'-triphosphate                      | 5-cadCTP                      | Trilink       | N-2063          | 514.0024           | 156.0404    |
| <i>N</i> <sup>1</sup> -Methylguanosine-5'-triphosphate          | <i>N</i> <sup>1</sup> -meGTP  | Trilink       | N-1039          | 538.0186           | 166.0723    |
| <i>N</i> <sup>1</sup> -Methyladenosine-5'-triphosphate          | <i>N</i> <sup>1</sup> -meATP  | Trilink       | N-1042          | 522.0187           | 150.0774    |
| <i>N</i> <sup>6</sup> -Methyladenosine-5'-triphosphate          | <i>N</i> <sup>6</sup> -meATP  | Trilink       | N-1013          | 522.0187           | 150.0774    |
| <i>O</i> <sup>6</sup> -Methylguanosine-5'-triphosphate          | <i>O</i> <sup>6</sup> -meGTP  | Trilink       | N-1031          | 540.0292           | 168.0880    |
| 2'- <i>O</i> -Methylpseudouridine-5'-triphosphate               | 2'- <i>O</i> -meYTP           | Trilink       | N-1041          | 498.9915           | 113.0346    |
| 2'- <i>O</i> -Methyladenosine-5'-triphosphate                   | 2'- <i>O</i> -meATP           | Trilink       | N-1015          | 522.0187           | 136.0618    |
| 2'- <i>O</i> -Methylguanosine-5'-triphosphate                   | 2'- <i>O</i> -meGTP           | Trilink       | N-1017          | 538.0186           | 152.0576    |
| 2'- <i>O</i> -Methylcytidine-5'-triphosphate                    | 2'- <i>O</i> -meCTP           | Trilink       | N-1016          | 498.0074           | 112.0505    |
| 2'- <i>O</i> -Methyluridine-5'-triphosphate                     | 2'- <i>O</i> -meUTP           | Trilink       | N-1018          | 498.9915           | 113.0346    |
| 2'- <i>O</i> -Methylinosine-5'-triphosphate                     | 2'- <i>O</i> -meITP           | Trilink       | N-1021          | 541.0113           | 169.0720    |
| 2-Thiouridine-5'-triphosphate                                   | 2-S-UTP                       | Trilink       | N-1032          | 500.9530           | 129.0117    |
| 5-Methyluridine-5'-triphosphate                                 | 5-meUTP                       | Trilink       | N-1024          | 498.9915           | 127.0502    |
| 5-Carboxymethylesteruridine-5'-triphosphate                     | 5-caesUTP                     | Trilink       | N-1096          | 542.9812           | 171.0400    |
| 5-Methylcytidine-5'-triphosphate                                | 5-meCTP                       | Trilink       | N-1014          | 498.0074           | 126.0662    |
| 5-Hydroxymethylcytidine-5'-triphosphate                         | 5-hmCTP                       | Trilink       | N-1087          | 514.0024           | 142.0611    |
| 5-Formylcytidine-5'-triphosphate                                | 5-foCTP                       | Trilink       | N-1085          | 511.9867           | 140.0455    |
| <i>N</i> <sup>7</sup> -methylguanosine-5'-triphosphate          | 7-meGTP                       | Sigma-Aldrich | M6133           | 539.0209           | 166.0723    |
| Inosine-5'-triphosphate                                         | ITP                           | Trilink       | N-1020          | 508.9870           | 137.0458    |
| Xanthosine-5'-triphosphate                                      | XTP                           | Trilink       | N-1023          | 524.9820           | 153.0407    |
| Pseudouridine-5'-triphosphate                                   | YTP                           | Trilink       | N-1019          | 498.9915           | 113.0346    |
| 2'-deoxyadenosine-5'-triphosphate                               | dATP                          | Sigma-Aldrich | 30927           | 492.0081           | 136.0618    |
| 2'-deoxycytidine-5'-triphosphate                                | dCTP                          | Sigma-Aldrich | D4635           | 467.9969           | 112.0505    |
| 2'-deoxyguanosine-5'-triphosphate                               | dGTP                          | Sigma-Aldrich | 1105146600<br>1 | 508.0030           | 152.0576    |
| 2'-deoxythymidine-5'-triphosphate                               | TTP                           | Sigma-Aldrich | T0251           | 482.9965           | 127.0502    |
| Adenosine-5'-triphosphate                                       | ATP                           | Sigma-Aldrich | A26209          | 508.0030           | 136.0618    |
| Cytidine-5'-triphosphate                                        | CTP                           | Sigma-Aldrich | C1506           | 483.9918           | 112.0505    |
| Guanosine-5'-triphosphate                                       | GTP                           | Sigma-Aldrich | G8877           | 523.9979           | 152.0576    |
| Uridine-5'-triphosphate                                         | UTP                           | Sigma-Aldrich | 94370           | 484.9758           | 113.0346    |

**Table S2.** The MRM parameters for the analysis of 8-MQ-NTPs.

| Analytes            | Scan mode | Precursor ion ( $m/z$ ) | Product ion ( $m/z$ ) | Collision energy (eV) |
|---------------------|-----------|-------------------------|-----------------------|-----------------------|
| 8-MQ- $N^4$ -medCTP | +         | 623.1                   | 126.1                 | 45                    |
| 8-MQ- $N^6$ -medATP | +         | 647.1                   | 150.1                 | 45                    |
| 8-MQ-5-medCTP       | +         | 623.1                   | 126.1                 | 45                    |
| 8-MQ-5-hmdCTP       | +         | 639.1                   | 142.1                 | 45                    |
| 8-MQ-5-fodCTP       | +         | 637.1                   | 140.1                 | 47                    |
| 8-MQ-5-cadCTP       | +         | 653.1                   | 156.1                 | 47                    |
| 8-MQ- $N^1$ -meGTP  | +         | 679.1                   | 166.1                 | 45                    |
| 8-MQ- $N^1$ -meATP  | +         | 663.1                   | 150.1                 | 45                    |
| 8-MQ- $N^6$ -meATP  | +         | 663.1                   | 150.1                 | 45                    |
| 8-MQ- $O^6$ -meGTP  | +         | 679.1                   | 168.1                 | 47                    |
| 8-MQ-2'- $O$ -meYTP | +         | 640.1                   | 113.1                 | 47                    |
| 8-MQ-2'- $O$ -meATP | +         | 663.1                   | 136.1                 | 47                    |
| 8-MQ-2'- $O$ -meGTP | +         | 679.1                   | 152.1                 | 47                    |
| 8-MQ-2'- $O$ -meCTP | +         | 639.1                   | 112.1                 | 47                    |
| 8-MQ-2'- $O$ -meUTP | +         | 640.1                   | 113.1                 | 47                    |
| 8-MQ-2'- $O$ -meITP | +         | 664.1                   | 169.1                 | 47                    |
| 8-MQ-2- $S$ -UTP    | +         | 642.1                   | 129.1                 | 47                    |
| 8-MQ-5-meUTP        | +         | 640.1                   | 127.1                 | 47                    |
| 8-MQ-5-caesUTP      | +         | 684.1                   | 171.2                 | 47                    |
| 8-MQ-5-meCTP        | +         | 639.1                   | 126.1                 | 45                    |
| 8-MQ-5-hmCTP        | +         | 655.1                   | 142.1                 | 45                    |
| 8-MQ-5-foCTP        | +         | 653.1                   | 140.1                 | 47                    |
| 8-MQ-7-meGTP        | +         | 679.1                   | 166.1                 | 47                    |
| 8-MQ-ITP            | +         | 650.1                   | 137.1                 | 47                    |
| 8-MQ-XTP            | +         | 666.1                   | 153.1                 | 47                    |
| 8-MQ-YTP            | +         | 626.1                   | 113.1                 | 47                    |
| 8-MQ-dATP           | +         | 633.1                   | 136.1                 | 47                    |
| 8-MQ-dCTP           | +         | 609.1                   | 112.1                 | 47                    |
| 8-MQ-dGTP           | +         | 649.1                   | 152.1                 | 47                    |
| 8-MQ-TTP            | +         | 624.1                   | 127.1                 | 47                    |
| 8-MQ-ATP            | +         | 649.1                   | 136.1                 | 47                    |
| 8-MQ-CTP            | +         | 625.1                   | 112.1                 | 47                    |
| 8-MQ-GTP            | +         | 665.1                   | 152.1                 | 47                    |
| 8-MQ-UTP            | +         | 626.1                   | 113.1                 | 47                    |

**Table S3.** Comparison of our developed chemical labeling coupled with LC-ESI-MS/MS method with other methods.

| Detection Methods                                                  | Samples analyzed                                                                  | Analytes                         | LOD (pmol)     | References    | Year |
|--------------------------------------------------------------------|-----------------------------------------------------------------------------------|----------------------------------|----------------|---------------|------|
| CE-UV                                                              | Standard sample                                                                   | ATP, GTP, UTP                    | 2200 - 4200    | 1             | 1996 |
| HPLC-electrochemical detection                                     | <i>E. coli</i> cells                                                              | dATP, dCTP, dGTP, TTP, 8-oxodGTP | 6              | 2             | 2002 |
| CE-UV                                                              | CHO cells                                                                         | ATP, CTP, GTP, UTP               | 12 - 85        | 3             | 2008 |
| Ion-pair HPLC-MS/MS                                                | <i>S. cerevisiae</i> , <i>Penicillium chrysogenum</i> and <i>Escherichia coli</i> | ATP, CTP, GTP, UTP, ITP          | 0.06 - 0.12    | 4             | 2009 |
| Ion-pair HPLC-MS                                                   | Cauliflower and beer                                                              | ATP, CTP, GTP, UTP, TTP          | 3.0 - 3.2      | 5             | 2010 |
| Ion-pair UPLC-MS/MS coupled with dispersive solid phase extraction | <i>Lactococcus lactis</i>                                                         | 8 canonical NTPs                 | 2.2 - 15.8     | 6             | 2013 |
| HPLC-UV                                                            | Royal jelly                                                                       | ATP                              | 1.9            | 7             | 2015 |
| HPLC-UV                                                            | Seaweeds                                                                          | ATP                              | 19             | 8             | 2016 |
| HPLC-MS/MS                                                         | Human cancer cell                                                                 | NTP analogues                    | 0.5            | 9             | 2017 |
| HPLC-MS/MS                                                         | Sturgeon spermatozoa                                                              | ATP                              | 1.9            | 10            | 2017 |
| Chemical labeling coupled with LC-ESI-MS/MS                        | Multiple mammalian cells and human tissues                                        | 20 NTPs                          | 0.0004 - 0.003 | Current study | 2017 |

**Table S4.** Contents of the detected NTPs in cultured cells.

| Modified NTPs                | Contents of NTPs (fmol/mg protein) |            |                |
|------------------------------|------------------------------------|------------|----------------|
|                              | 293T cells                         | HeLa cells | Jurkat-T cells |
| 5-medCTP                     | 2.4 ± 0.13                         | 2.0 ± 0.11 | 2.9 ± 0.13     |
| 5-hmdCTP                     | 3.2 ± 0.31                         | 2.7 ± 0.22 | 3.3 ± 0.32     |
| <i>N</i> <sup>1</sup> -meATP | 2.2 ± 0.07                         | 2.5 ± 0.23 | 2.9 ± 0.10     |
| <i>N</i> <sup>6</sup> -meATP | 2.3 ± 0.16                         | 2.2 ± 0.11 | 3.0 ± 0.10     |
| 2'- <i>O</i> -meATP          | 2.9 ± 0.14                         | 2.5 ± 0.21 | 2.4 ± 0.11     |
| 2'- <i>O</i> -meGTP          | 1.7 ± 0.12                         | 1.5 ± 0.12 | 2.0 ± 0.10     |
| 2- <i>S</i> -UTP             | 13.2 ± 0.74                        | 5.0 ± 0.10 | 2.5 ± 0.21     |
| 5-meCTP                      | 5.2 ± 0.51                         | 4.1 ± 0.30 | 4.8 ± 0.20     |
| 5-hmCTP                      | 1.9 ± 0.09                         | 1.0 ± 0.04 | 1.3 ± 0.11     |
| 7-meGTP                      | 7.5 ± 0.64                         | 6.1 ± 0.32 | 8.4 ± 0.94     |
| ITP                          | 12.8 ± 1.21                        | 6.9 ± 0.73 | 11.2 ± 0.73    |
| XTP                          | 2.9 ± 0.11                         | 2.3 ± 0.21 | 3.5 ± 0.21     |

\*n.d., not detected.

**Table S5.** Linearities, LODs and LOQs of NTPs with 8-DMQ labeling followed by LC-ESI-MS/MS analysis.

| Analytes                           | Linear range<br>(fmol/ $\mu$ L) | Calibration curve data |           |                      | LOD<br>(fmol) | LOQ<br>(fmol) |
|------------------------------------|---------------------------------|------------------------|-----------|----------------------|---------------|---------------|
|                                    |                                 | Slope                  | Intercept | R <sup>2</sup> value |               |               |
| 8-MQ-5-medCTP                      | 10-2500                         | 0.0086                 | -0.2922   | 0.9998               | 1.0           | 3.2           |
| 8-MQ-5-hmdCTP                      |                                 | 0.0092                 | -0.0257   | 0.9987               | 1.9           | 6.2           |
| 8-MQ- <i>N</i> <sup>1</sup> -meATP |                                 | 0.0096                 | -0.3273   | 0.9987               | 0.9           | 3.0           |
| 8-MQ- <i>N</i> <sup>6</sup> -meATP |                                 | 0.0542                 | -2.2522   | 0.9927               | 0.4           | 1.3           |
| 8-MQ-2'- <i>O</i> -meATP           |                                 | 0.0473                 | -2.2330   | 0.9903               | 0.4           | 1.3           |
| 8-MQ-2'- <i>O</i> -meGTP           |                                 | 0.0217                 | -0.6158   | 0.9958               | 0.7           | 2.1           |
| 8-MQ-2- <i>S</i> -UTP              |                                 | 0.0087                 | -0.2838   | 0.9933               | 1.2           | 3.2           |
| 8-MQ-5-meCTP                       |                                 | 0.0049                 | -0.2574   | 0.9929               | 1.9           | 6.3           |
| 8-MQ-5-hmCTP                       |                                 | 0.0038                 | -0.1844   | 0.9936               | 2.5           | 8.2           |
| 8-MQ-7-meGTP                       |                                 | 0.0013                 | -0.1525   | 0.9913               | 2.9           | 9.7           |
| 8-MQ-ITP                           |                                 | 0.0103                 | -0.2949   | 0.9963               | 0.8           | 2.5           |
| 8-MQ-XTP                           |                                 | 0.0022                 | -0.0928   | 0.9974               | 2.0           | 6.5           |
| 8-MQ-dATP                          |                                 | 0.0889                 | -0.7845   | 0.9952               | 0.4           | 1.3           |
| 8-MQ-dCTP                          |                                 | 0.0173                 | -0.6009   | 0.9987               | 0.6           | 2.1           |
| 8-MQ-dGTP                          |                                 | 0.0155                 | -0.0524   | 0.9993               | 1.1           | 3.2           |
| 8-MQ-TTP                           |                                 | 0.0337                 | 0.0138    | 0.9974               | 0.5           | 1.5           |
| 8-MQ-ATP                           |                                 | 0.0966                 | -5.4890   | 0.9909               | 0.6           | 2.1           |
| 8-MQ-CTP                           |                                 | 0.0073                 | -0.3217   | 0.9964               | 1.3           | 4.2           |
| 8-MQ-GTP                           |                                 | 0.0230                 | -0.6791   | 0.9987               | 0.6           | 1.9           |
| 8-MQ-UTP                           |                                 | 0.0004                 | -0.0244   | 0.9974               | 2.9           | 9.7           |



**Table S6.** Accuracy and precision for the detection of modified NTPs by 8-DMQ labeling coupled with LC-ESI-MS/MS analysis.

| Analytes                           | QCs    | Theoretical value (fmol/ $\mu$ L) | Measured value (fmol/ $\mu$ L) | Relative error (%) | Intra-day RSD%, n=3 | Inter-day RSD%, n=3 |
|------------------------------------|--------|-----------------------------------|--------------------------------|--------------------|---------------------|---------------------|
| 8-MQ-5-medCTP                      | Low    | 20                                | 19                             | -5.0               | 9.5                 | 8.7                 |
|                                    | Medium | 100                               | 88                             | -12.0              | 7.1                 | 11.2                |
|                                    | High   | 500                               | 543                            | 8.6                | 10.5                | 7.5                 |
| 8-MQ-5-hmdCTP                      | Low    | 20                                | 21                             | 5.0                | 13.6                | 9.3                 |
|                                    | Medium | 100                               | 111                            | 11.0               | 7.7                 | 9.5                 |
|                                    | High   | 500                               | 463                            | -7.4               | 10.4                | 7.3                 |
| 8-MQ- <i>N</i> <sup>1</sup> -meATP | Low    | 20                                | 22                             | 10.0               | 10.7                | 7.8                 |
|                                    | Medium | 100                               | 109                            | 9.0                | 10.7                | 9.5                 |
|                                    | High   | 500                               | 552                            | 10.4               | 10.6                | 4.8                 |
| 8-MQ- <i>N</i> <sup>6</sup> -meATP | Low    | 20                                | 21                             | 5.0                | 3.3                 | 5.6                 |
|                                    | Medium | 100                               | 102                            | 2.0                | 5.9                 | 10.4                |
|                                    | High   | 500                               | 522                            | 4.4                | 6.5                 | 12.6                |
| 8-MQ-2'- <i>O</i> -meATP           | Low    | 20                                | 21                             | 5.0                | 11.4                | 10.3                |
|                                    | Medium | 100                               | 112                            | 12.0               | 12.8                | 11.2                |
|                                    | High   | 500                               | 483                            | -3.4               | 10.9                | 13.9                |
| 8-MQ-2'- <i>O</i> -meGTP           | Low    | 20                                | 19                             | -5.0               | 5.2                 | 3.9                 |
|                                    | Medium | 100                               | 111                            | 11.0               | 9.9                 | 4.9                 |
|                                    | High   | 500                               | 544                            | 8.8                | 10.5                | 6.9                 |
| 8-MQ-2- <i>S</i> -UTP              | Low    | 20                                | 22                             | 10.0               | 9.8                 | 9.2                 |
|                                    | Medium | 100                               | 109                            | 9.0                | 10.2                | 6.5                 |
|                                    | High   | 500                               | 562                            | 12.4               | 11.2                | 5.9                 |
| 8-MQ-5-meCTP                       | Low    | 20                                | 18                             | -10.0              | 5.7                 | 9.7                 |
|                                    | Medium | 100                               | 113                            | 13.0               | 9.4                 | 8.8                 |
|                                    | High   | 500                               | 488                            | -2.4               | 8.9                 | 7.7                 |
| 8-MQ-5-hmCTP                       | Low    | 20                                | 19                             | -5.0               | 11.5                | 4.4                 |
|                                    | Medium | 100                               | 111                            | 11.0               | 12.6                | 5.9                 |
|                                    | High   | 500                               | 552                            | 10.4               | 13.8                | 6.8                 |
| 8-MQ-7-meGTP                       | Low    | 20                                | 21                             | 5.0                | 9.8                 | 8.7                 |
|                                    | Medium | 100                               | 90                             | -10.0              | 3.9                 | 6.4                 |
|                                    | High   | 500                               | 562                            | 12.4               | 5.9                 | 11.2                |
| 8-MQ-ITP                           | Low    | 20                                | 18                             | -10.0              | 6.7                 | 9.6                 |
|                                    | Medium | 100                               | 109                            | 9.0                | 6.7                 | 6.8                 |
|                                    | High   | 500                               | 552                            | 10.4               | 6.9                 | 10.3                |
| 8-MQ-XTP                           | Low    | 20                                | 22                             | 10.0               | 8.9                 | 10.7                |
|                                    | Medium | 100                               | 106                            | 6.0                | 9.7                 | 12.7                |
|                                    | High   | 500                               | 542                            | 8.4                | 8.9                 | 11.8                |
| 8-MQ-dATP                          | Low    | 20                                | 18                             | -10.0              | 2.9                 | 14.3                |
|                                    | Medium | 100                               | 89                             | -11.0              | 8.3                 | 12.2                |
|                                    | High   | 500                               | 562                            | 12.4               | 13.2                | 9.5                 |
| 8-MQ-dCTP                          | Low    | 20                                | 18                             | -10.0              | 11.2                | 10.4                |
|                                    | Medium | 100                               | 112                            | 12.0               | 10.9                | 10.9                |
|                                    | High   | 500                               | 569                            | 13.8               | 12.3                | 12.4                |
| 8-MQ-dGTP                          | Low    | 20                                | 19                             | -5.0               | 6.7                 | 10.4                |
|                                    | Medium | 100                               | 112                            | 12.0               | 8.9                 | 9.8                 |
|                                    | High   | 500                               | 522                            | 4.4                | 10.3                | 10.3                |
| 8-MQ-TTP                           | Low    | 20                                | 19                             | -5.0               | 14.7                | 6.7                 |
|                                    | Medium | 100                               | 91                             | -9.0               | 6.9                 | 9.2                 |
|                                    | High   | 500                               | 433                            | -13.4              | 3.4                 | 8.7                 |
| 8-MQ-ATP                           | Low    | 20                                | 22                             | 10.0               | 6.9                 | 4.4                 |
|                                    | Medium | 100                               | 109                            | 9.0                | 10.2                | 5.9                 |
|                                    | High   | 500                               | 476                            | -4.8               | 11.9                | 4.6                 |
| 8-MQ-CTP                           | Low    | 20                                | 19                             | -5.0               | 4.5                 | 10.6                |
|                                    | Medium | 100                               | 91                             | -9.0               | 6.2                 | 6.6                 |
|                                    | High   | 500                               | 555                            | 11.0               | 8.7                 | 14.8                |
| 8-MQ-GTP                           | Low    | 20                                | 21                             | 5.0                | 13.4                | 13.2                |
|                                    | Medium | 100                               | 112                            | 12.0               | 8.9                 | 11.3                |
|                                    | High   | 500                               | 522                            | 4.4                | 7.8                 | 10.7                |
| 8-MQ-UTP                           | Low    | 20                                | 19                             | -5.0               | 12.4                | 11.2                |
|                                    | Medium | 100                               | 114                            | 14.0               | 12.4                | 12.9                |
|                                    | High   | 500                               | 476                            | -4.8               | 14.9                | 12.3                |

**Figure S1.** The chemical structures of the 34 NTPs.

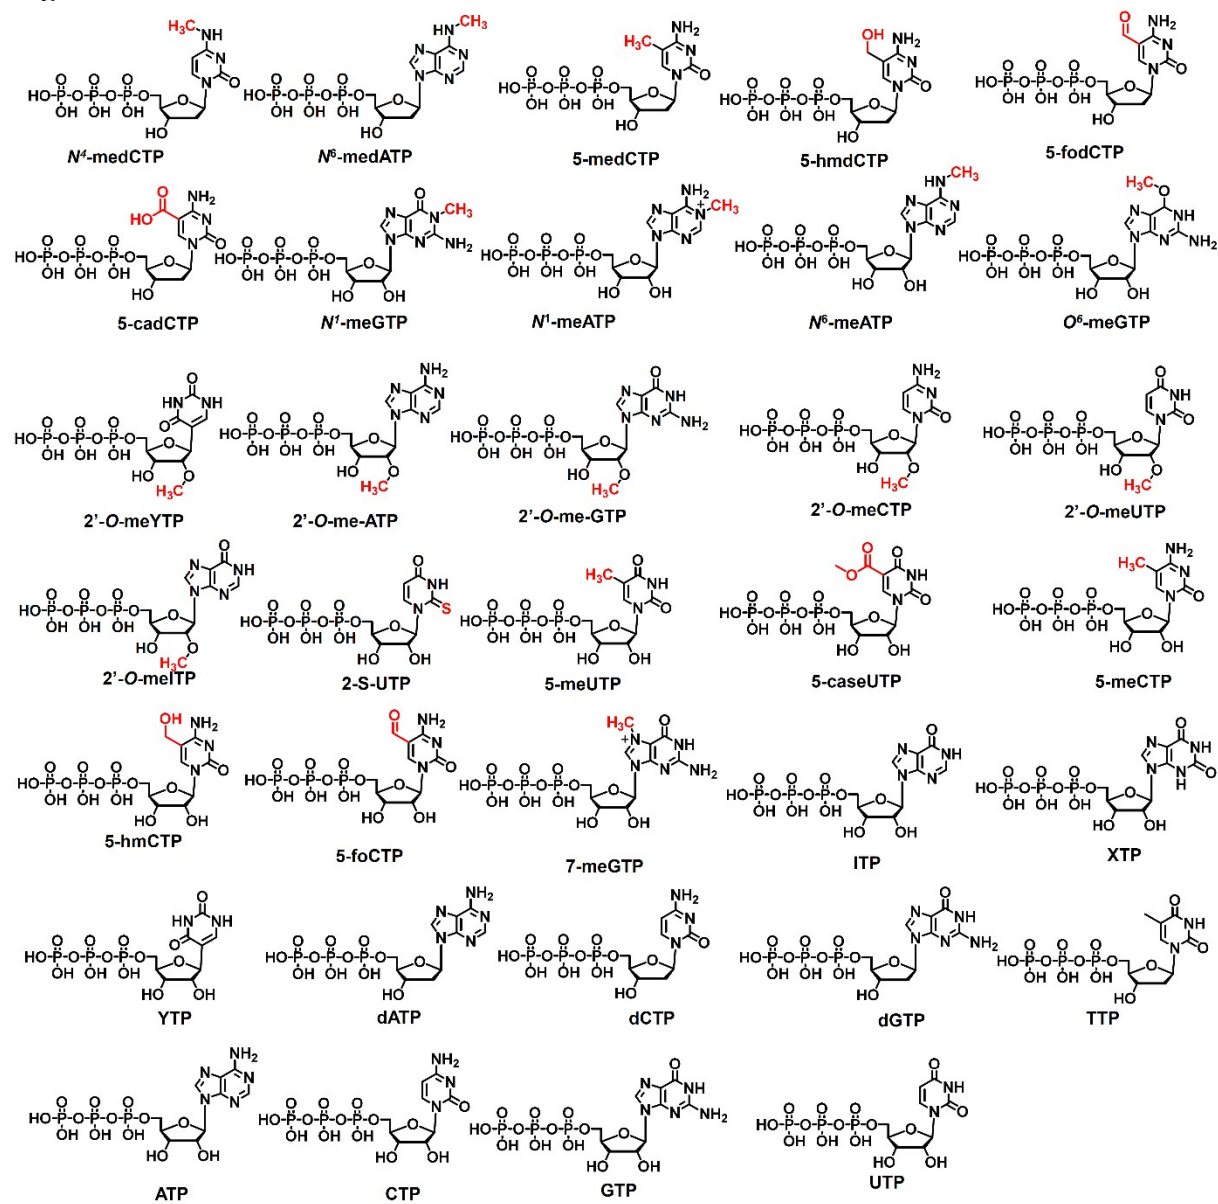

**Figure S2.** (A) Synthesis route of the 8-DMQ. (B) Characterization of 8-DMQ by the high-resolution mass spectrometry. Highlighted in red in (B) are the theoretical  $m/z$ .

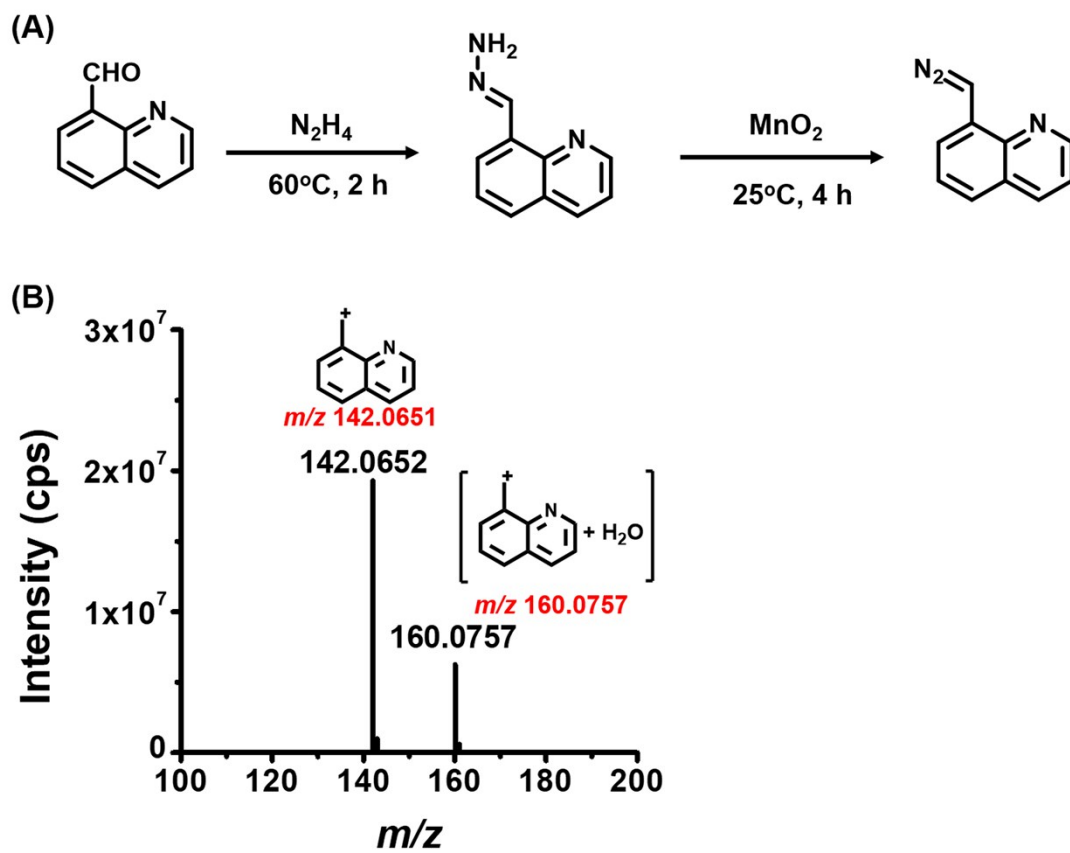

**Figure S3.** Characterization of the synthesized compounds by NMR. (A) The starting material of quinoline-8-carbaldehyde. (B) The product of 8-(hydrazonomethyl)quinolone from the first step synthesis. (C) 8-DMQ.

(A) The starting material of quinoline-8-carbaldehyde.

$^1\text{H}$  NMR (400 MHz,  $\text{DMSO-}d_6$ )  $\delta$  11.35 (s, 1H), 9.12 (dd,  $J = 4.2, 1.8$  Hz, 1H), 8.56 (dd,  $J = 8.4, 1.8$  Hz, 1H), 8.38 (dd,  $J = 8.2, 1.6$  Hz, 1H), 8.24 (dd,  $J = 7.2, 1.5$  Hz, 1H), 7.82-7.78 (m, 1H), 7.72 (dd,  $J = 8.4, 4.2$  Hz, 1H).

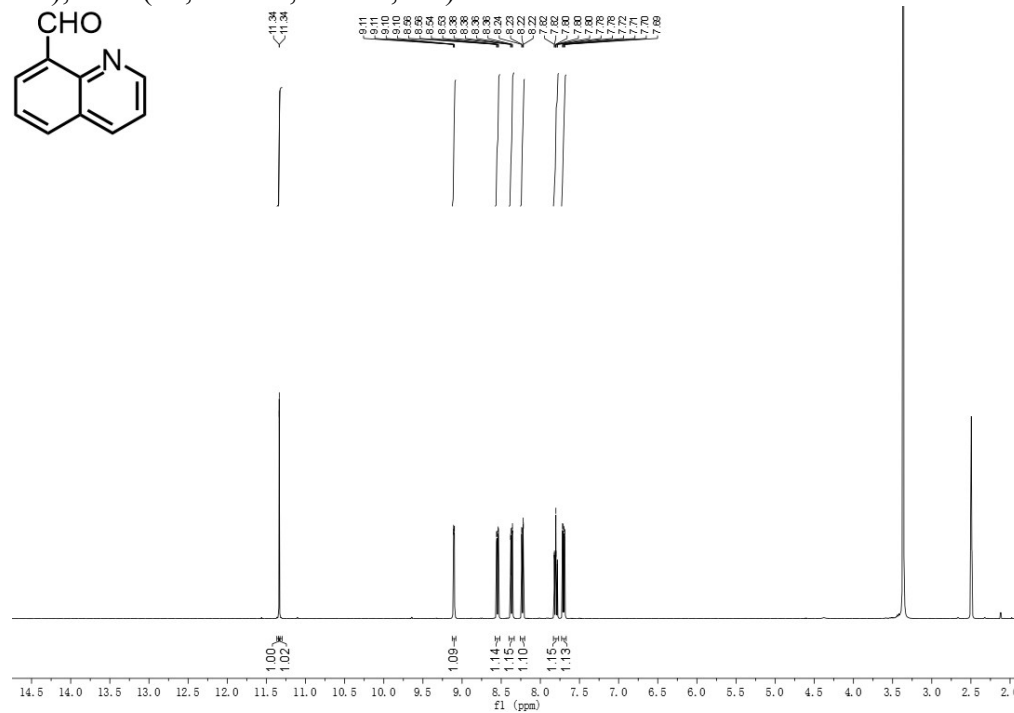

$^{13}\text{C}$  NMR (101 MHz,  $\text{DMSO-}d_6$ )  $\delta$  192.1, 151.9, 146.8, 136.9, 135.0, 131.0, 128.8, 128.1, 126.4, 122.4.

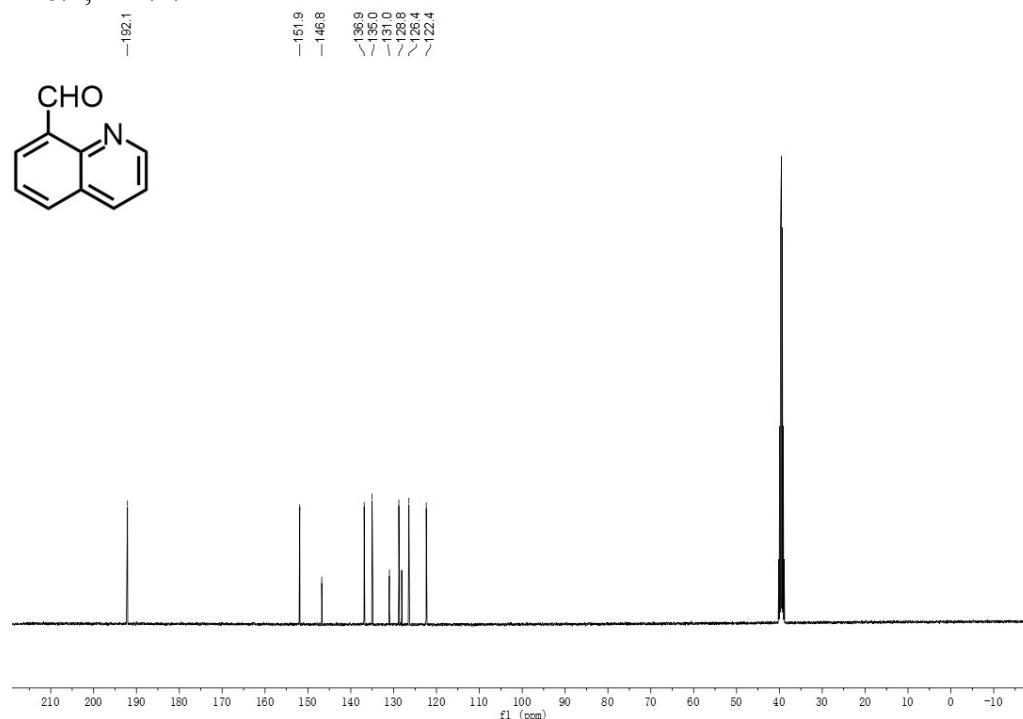

(B) The product of 8-(hydrazonomethyl)quinolone from the first step synthesis.

$^1\text{H}$  NMR (400 MHz,  $\text{DMSO-}d_6$ )  $\delta$  8.94 (s, 1H), 8.91 (dd,  $J = 4.1, 1.8$  Hz, 1H), 8.36 (dd,  $J = 8.3, 1.8$  Hz, 1H), 8.12 (dd,  $J = 7.4, 1.5$  Hz, 1H), 7.86 (dd,  $J = 8.1, 1.5$  Hz, 1H), 7.61 – 7.51 (m, 2H), 7.10 (s, 2H).

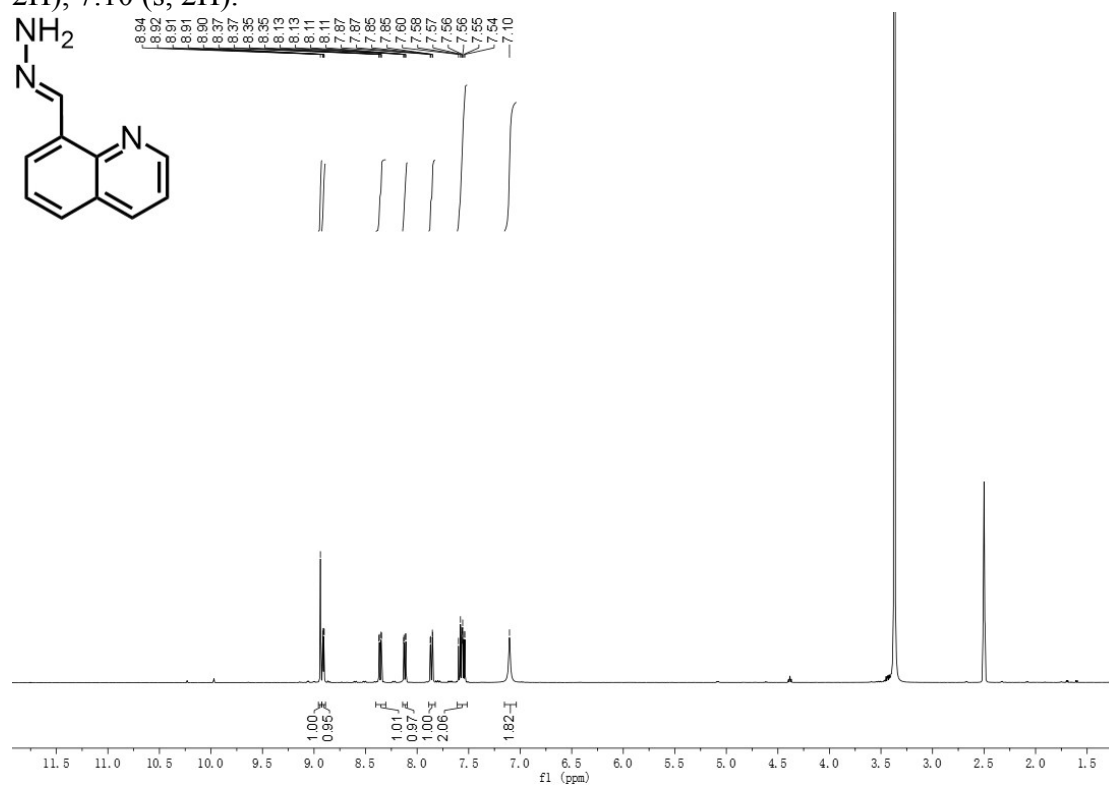

$^{13}\text{C}$  NMR (101 MHz,  $\text{DMSO-}d_6$ )  $\delta$  149.6, 144.5, 136.4, 134.7, 133.4, 128.1, 127.0, 126.6, 123.4, 121.5.

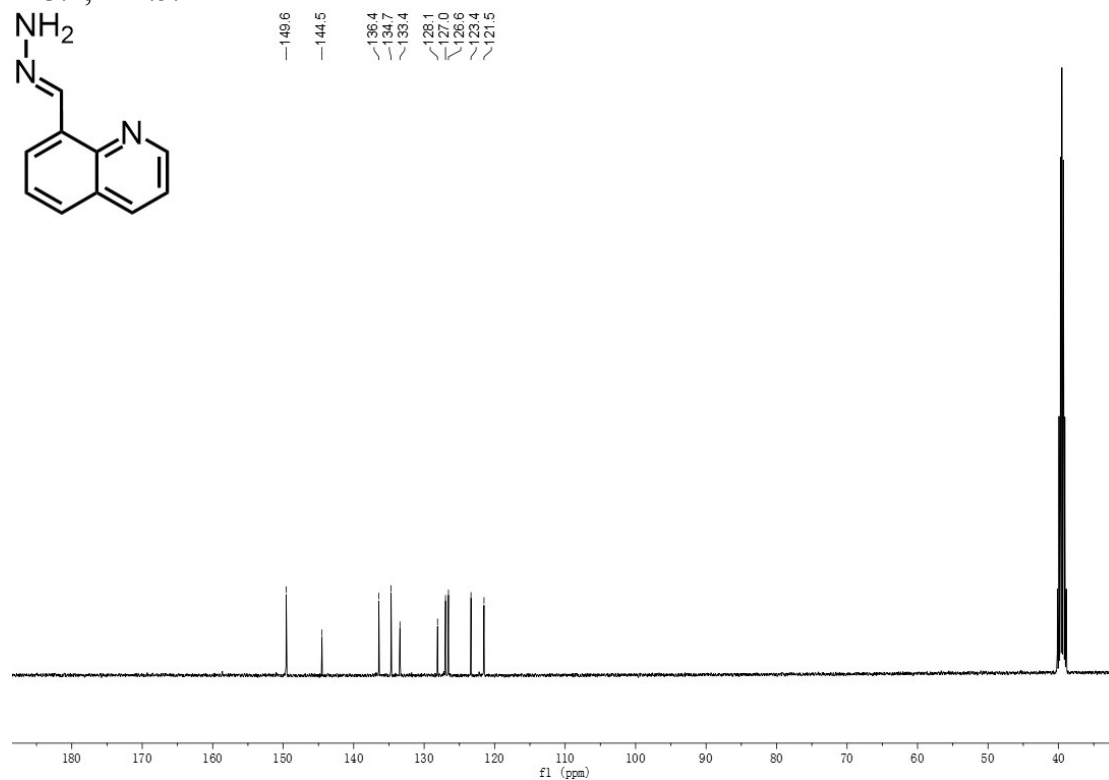

(C) 8-DMQ.

$^1\text{H}$  NMR (400 MHz,  $\text{DMSO-}d_6$ )  $\delta$  8.82 (s, 1H), 8.32 (d,  $J = 8.5$  Hz, 1H), 7.60-7.51 (m, 3H), 7.26 (d,  $J = 7.2$  Hz, 1H), 6.44 (s, 1H).

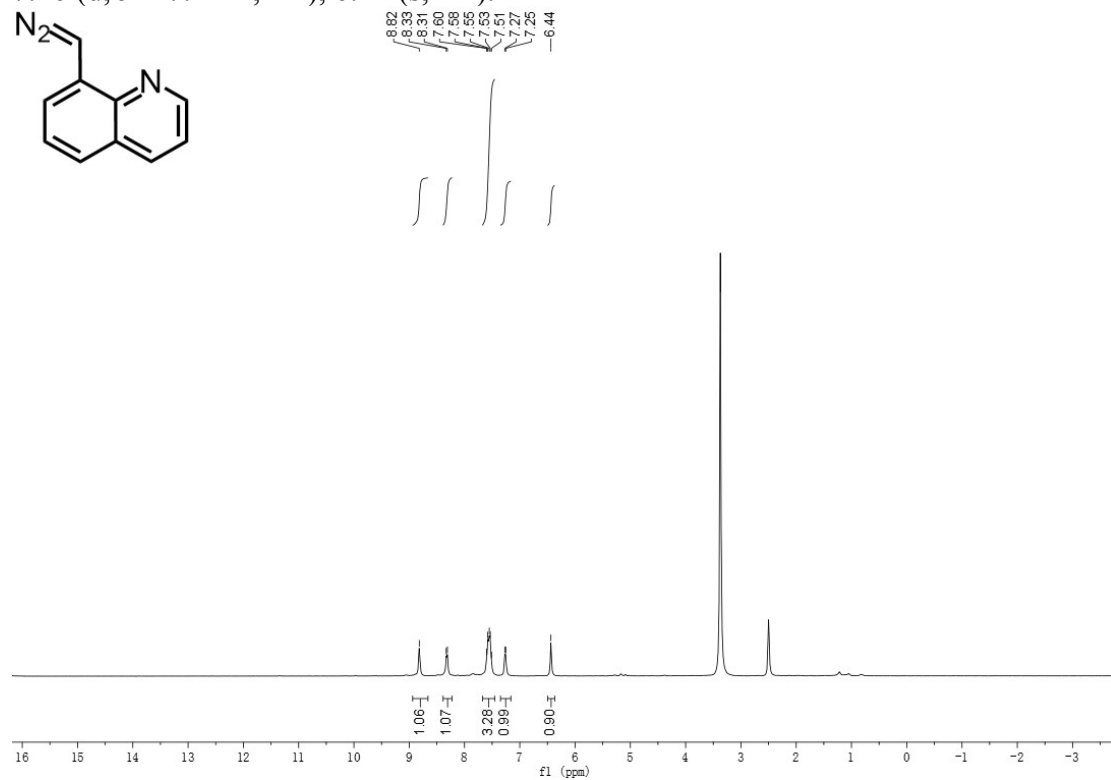

$^{13}\text{C}$  NMR (101 MHz,  $\text{DMSO-}d_6$ )  $\delta$  148.8, 142.5, 136.5, 128.9, 128.4, 126.9, 122.6, 122.0, 119.9, 43.9.

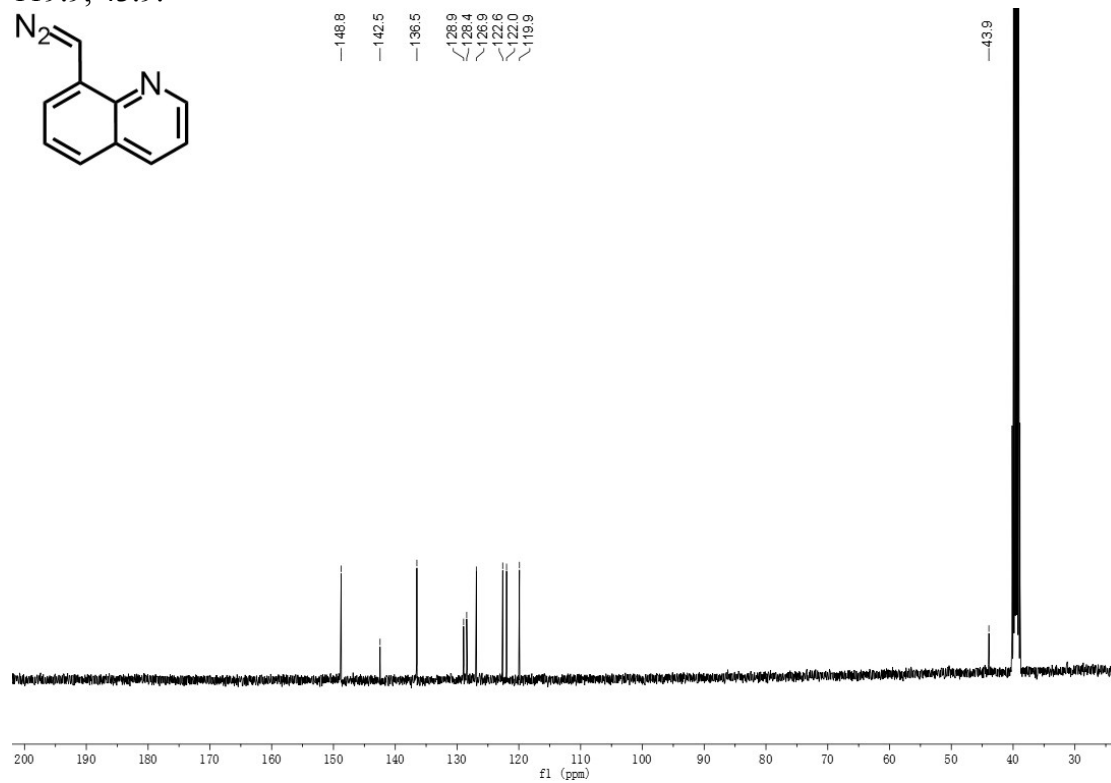

**Figure S4.** LC chromatograms of synthetic compounds. (A) Quinoline-8-carbaldehyde. (B) Purified 8-(hydrazonomethyl)quinolone. (C) Purified 8-DMQ. (D) Unpurified 8-DMQ. The synthetic compounds were analyzed on a Shimadzu LC-20AD HPLC system (Tokyo, Japan) with two 20AD pumps. An Accucore C18 column (150 mm × 2.1 mm i.d., 2.6 μm, Thermo Fisher Scientific, USA) was used for the separation. The column temperature was set at 35°C. 0.05% FA in water (solvent A) and methanol (solvent B) were employed as mobile phases. A gradient of 0 - 3 min 5% B, 3 - 5 min 5% to 12% B, 5 - 20 min 12% to 80% B and 20-25 min 80% B was used. The flow rate was set at 0.2 mL/min.

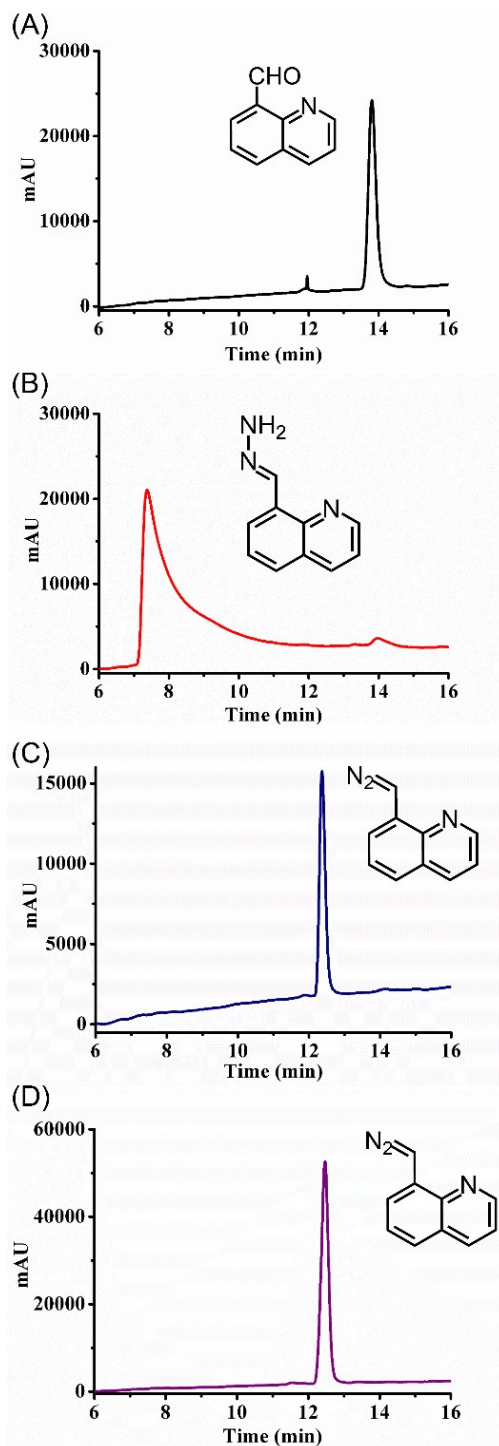

**Figure S5.** The extracted ion chromatograms, high-resolution MS spectra and product ions spectra of 8-DMQ-labeled 34 kinds of NTP standards.

1, ATP

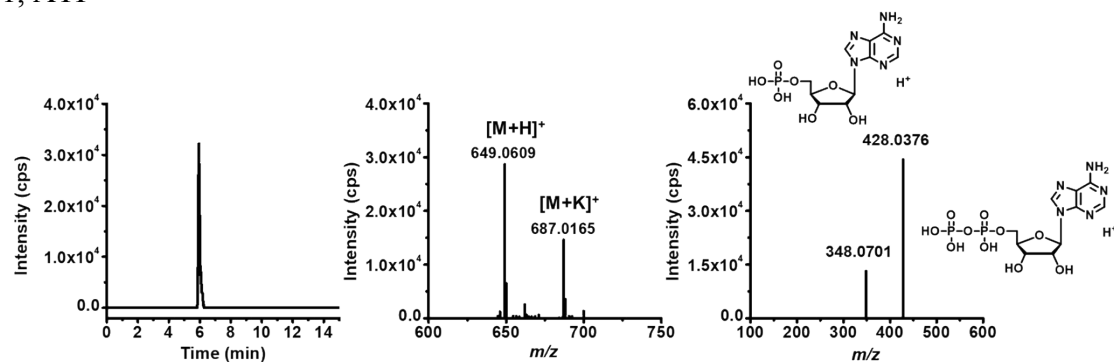

2, dATP

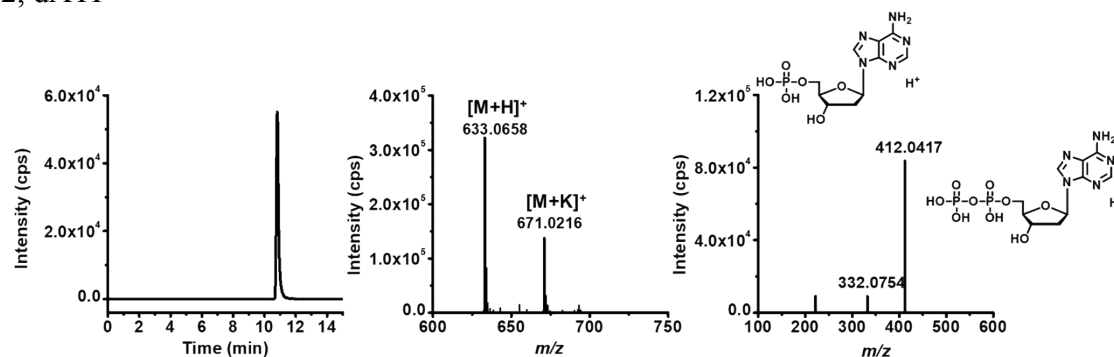

3, GTP

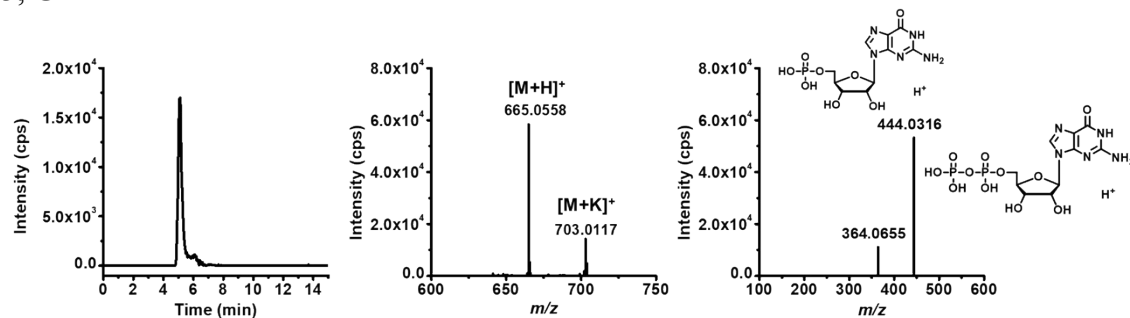

4, dGTP

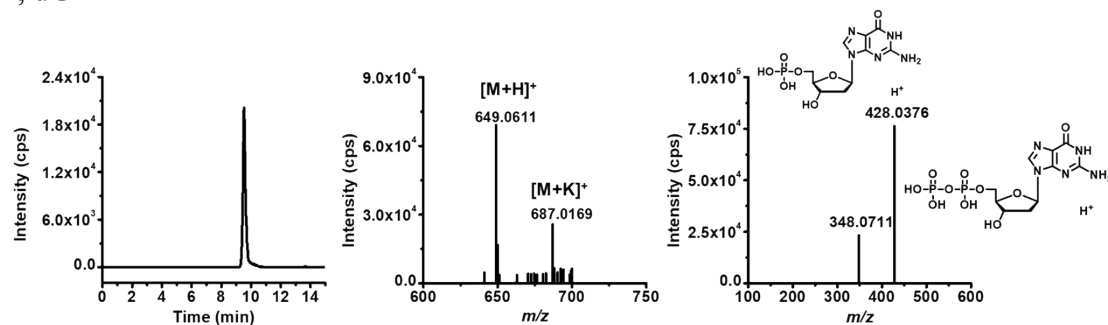



5, CTP;

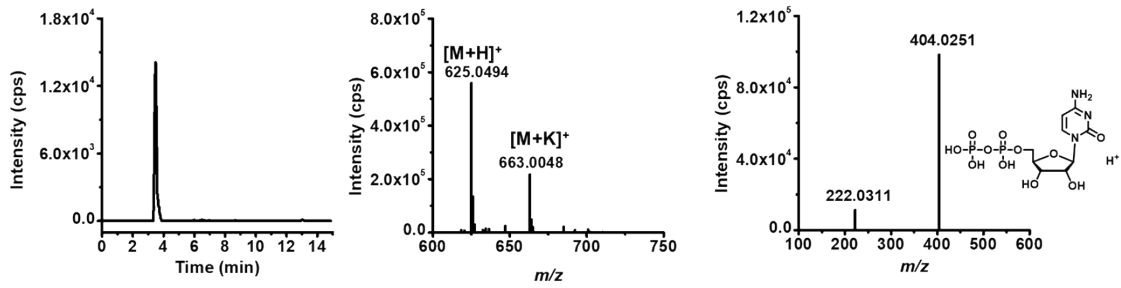

6, dCTP

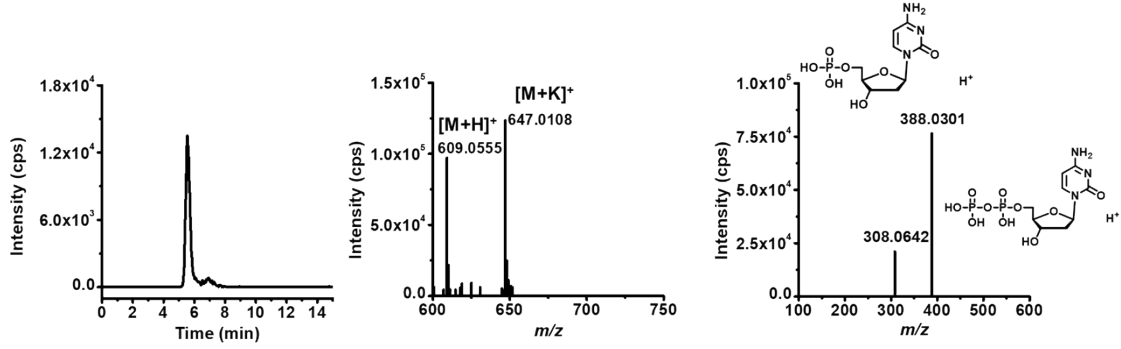

7, UTP

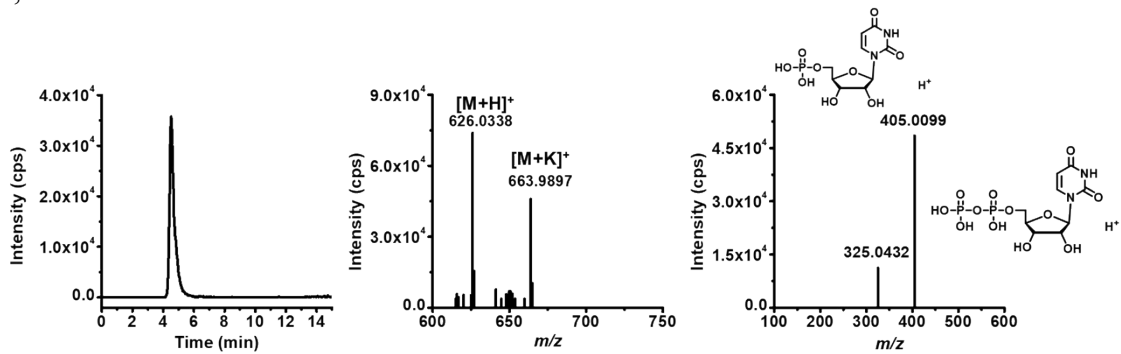

8, TTP

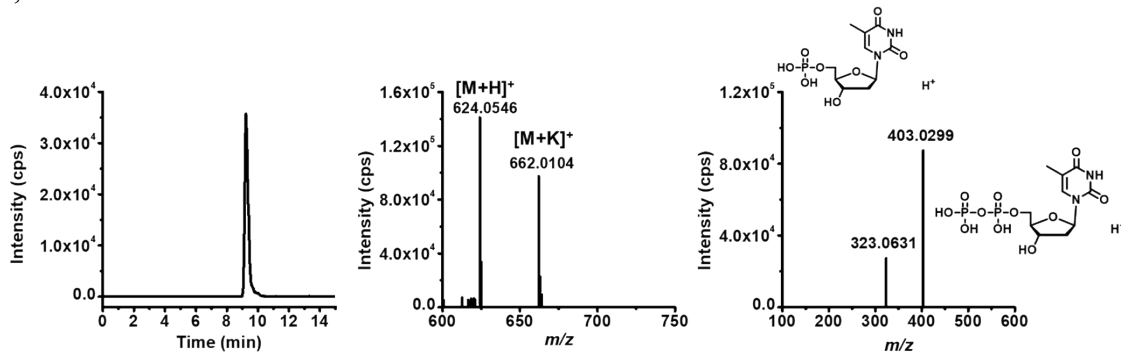

### 9, *N*<sup>6</sup>-meATP

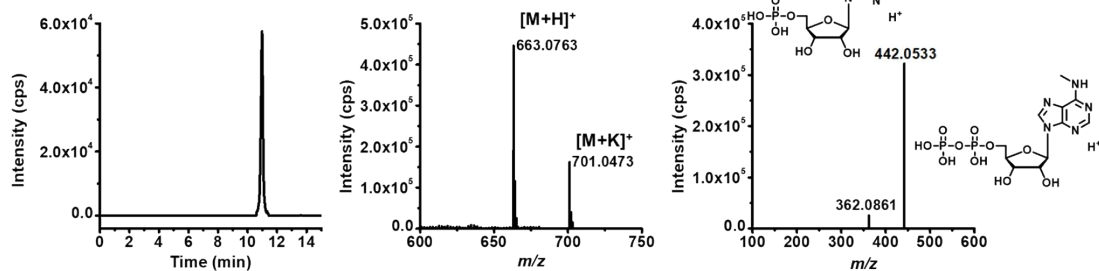

### 10, 7-meGTP

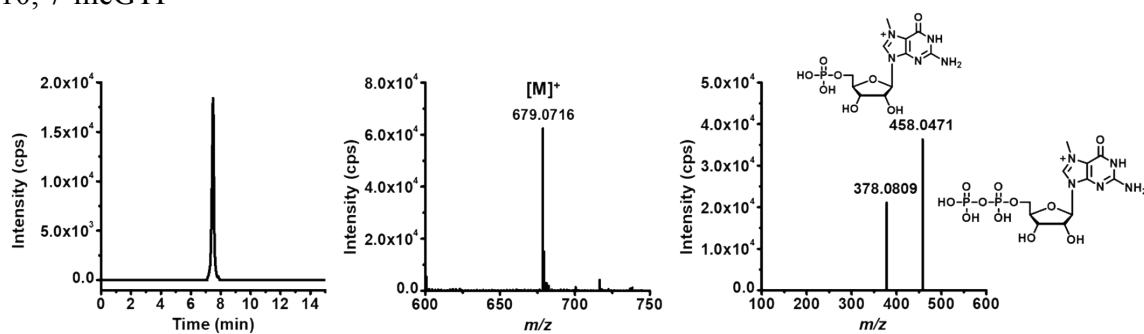

### 11, ITP

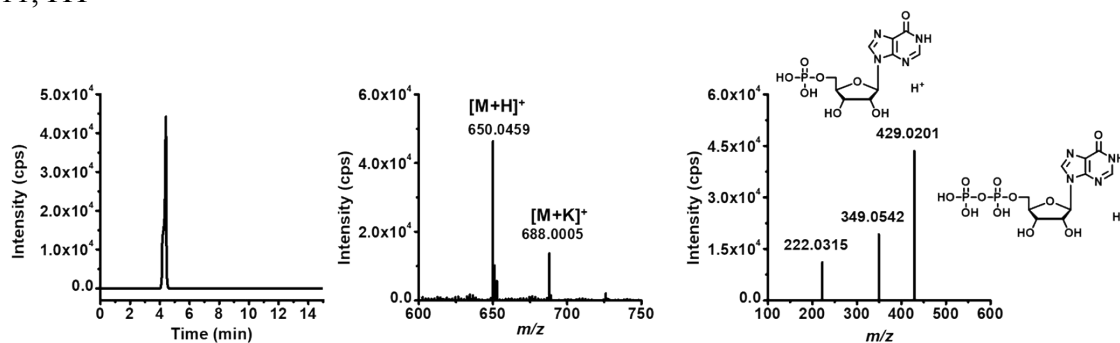

### 12, XTP

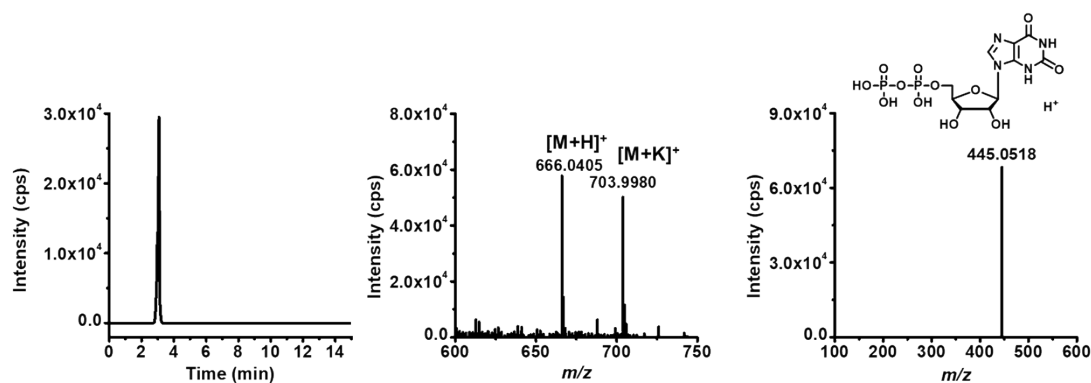

### 13, *N*<sup>1</sup>-meATP

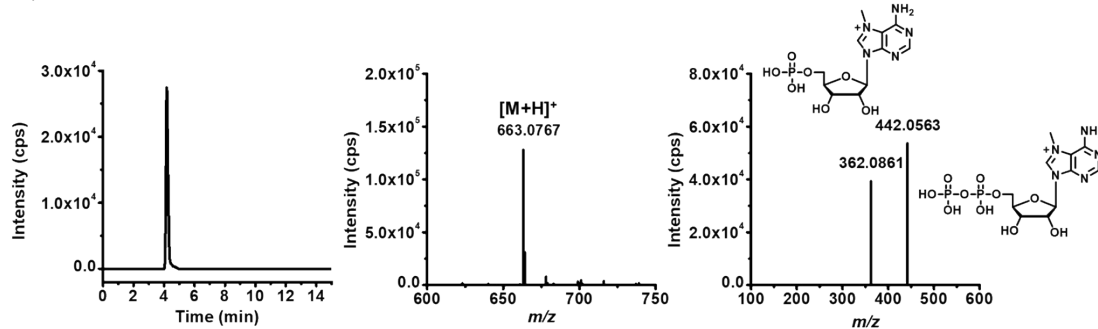

### 14, 2-S-UTP

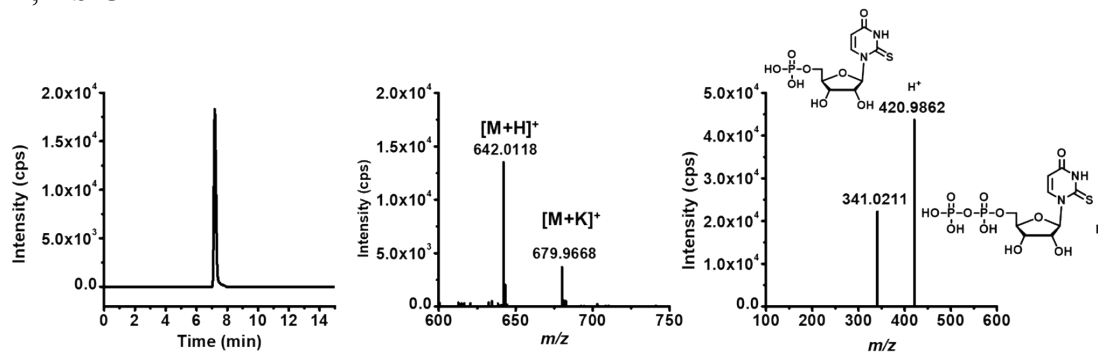

### 15, 5-hmCTP

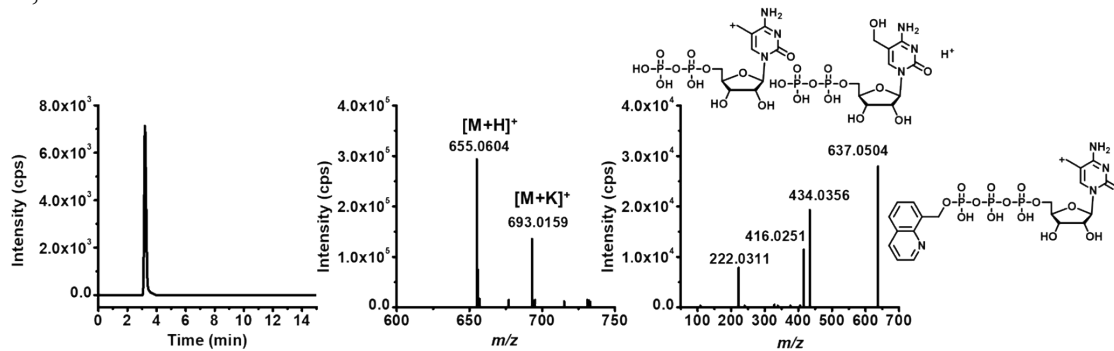

### 16, 5-meCTP

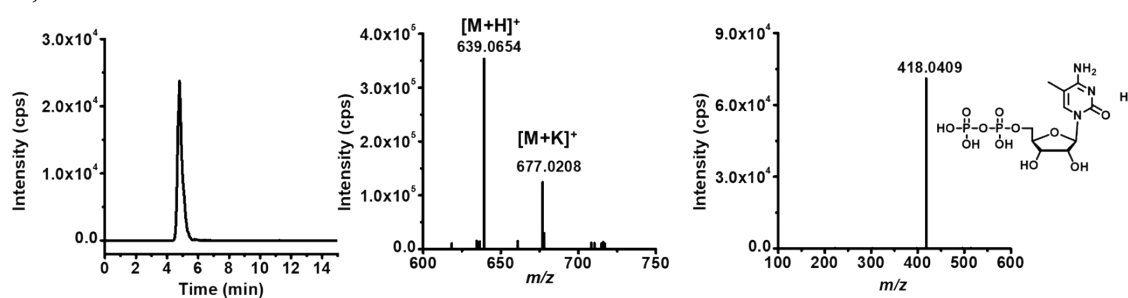

### 17, 5-medCTP

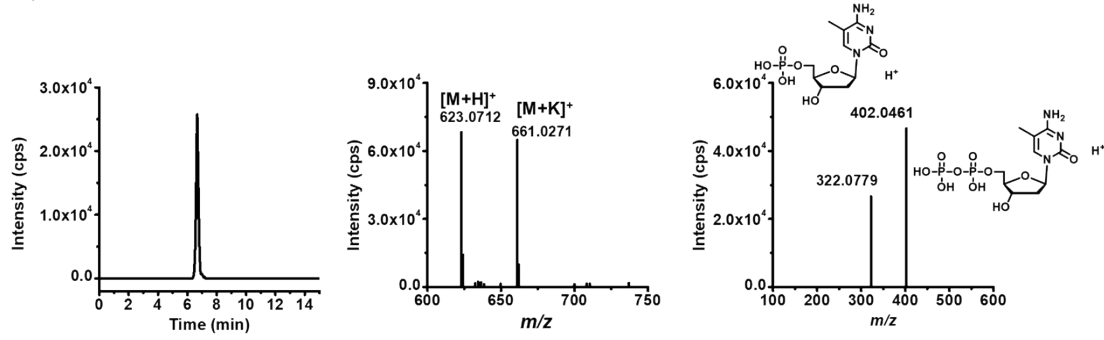

### 18, 5-hmdCTP

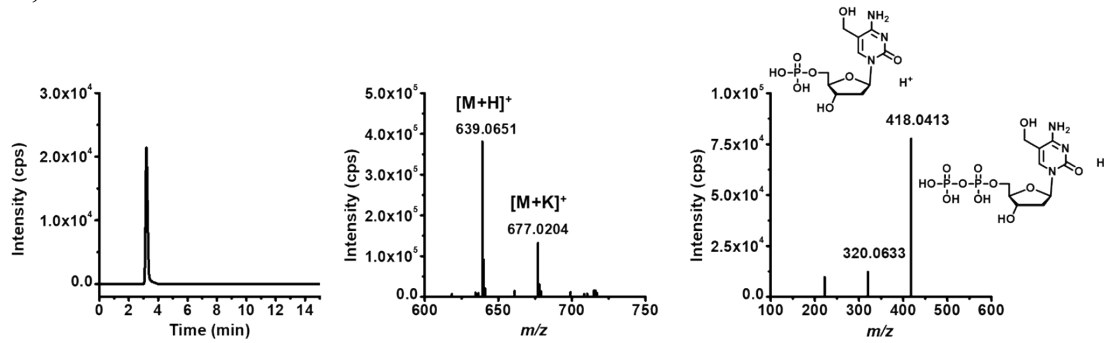

### 19, 2'-O-meATP

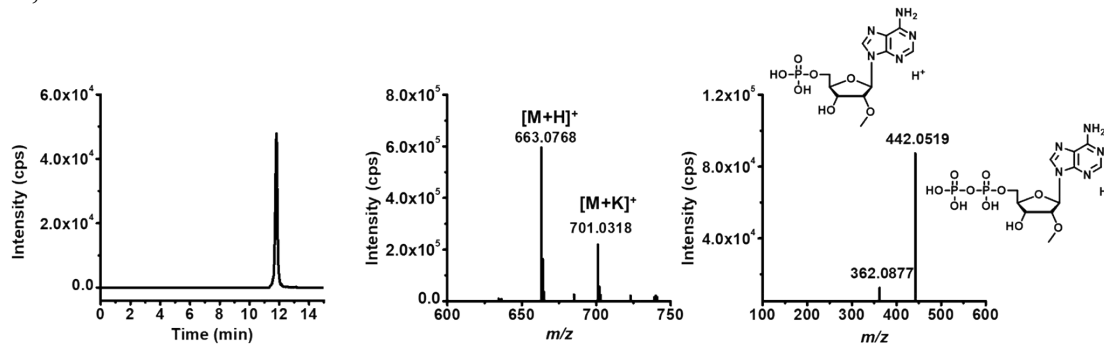

### 20, 2'-O-me-GTP

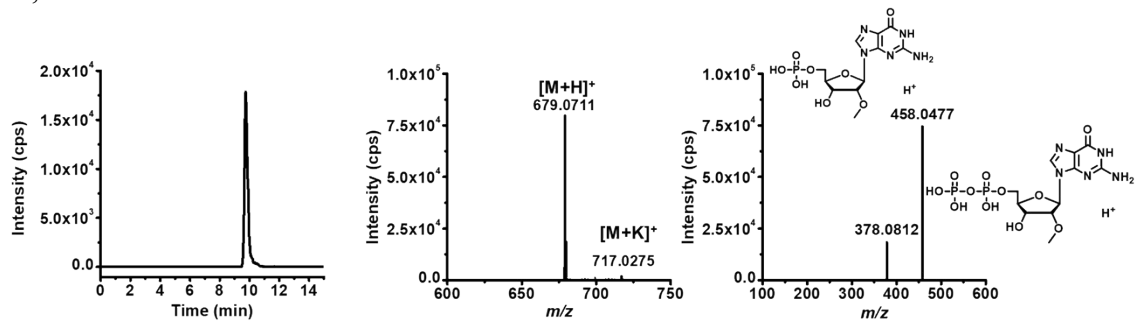

## 21, 5-cadCTP

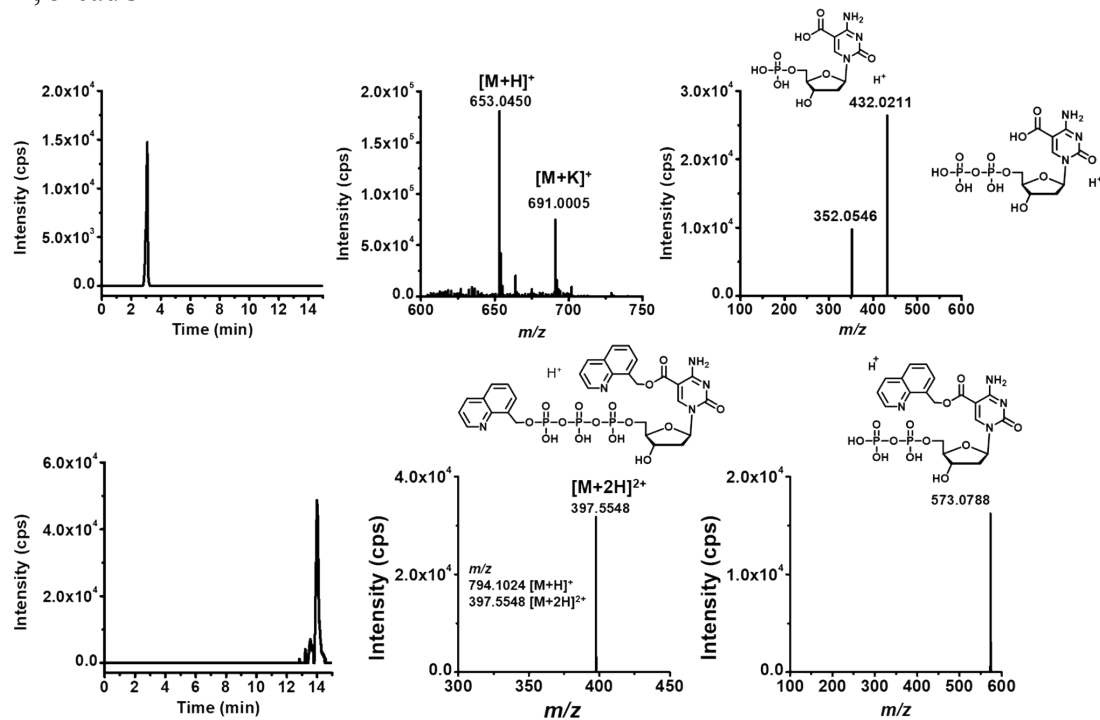

## 22, YTP

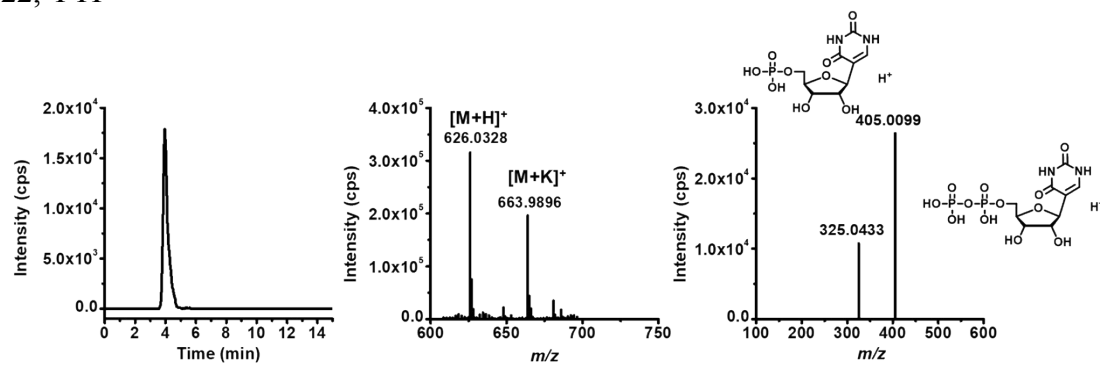

## 23, 2'-O-me-ITP

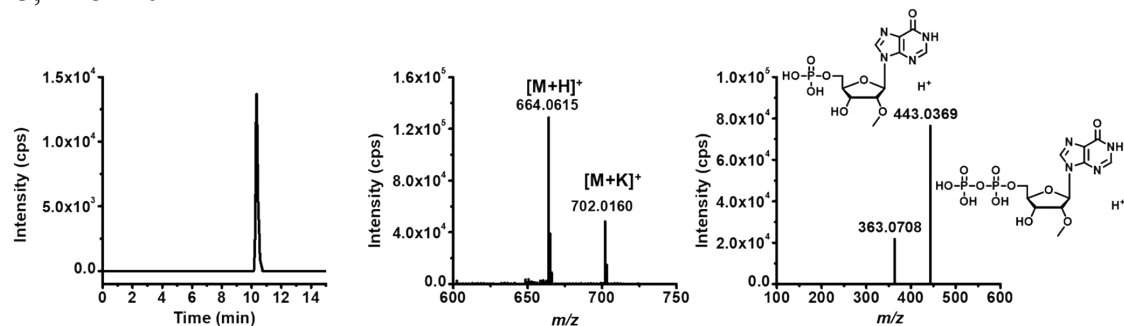

## 24, 5-meUTP

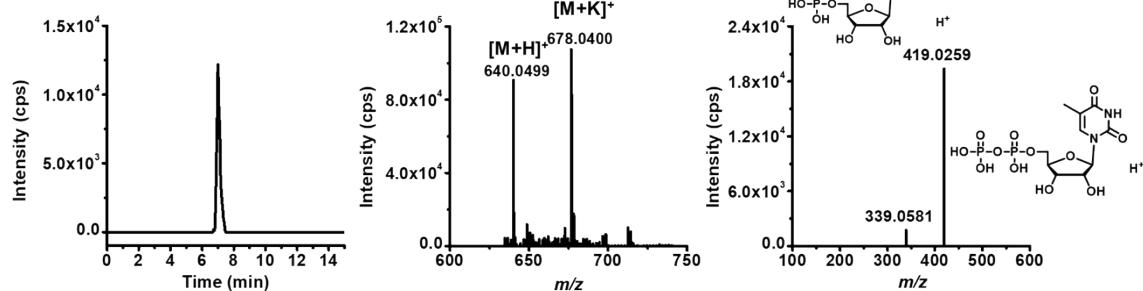

## 25, 2'-O-meCTP

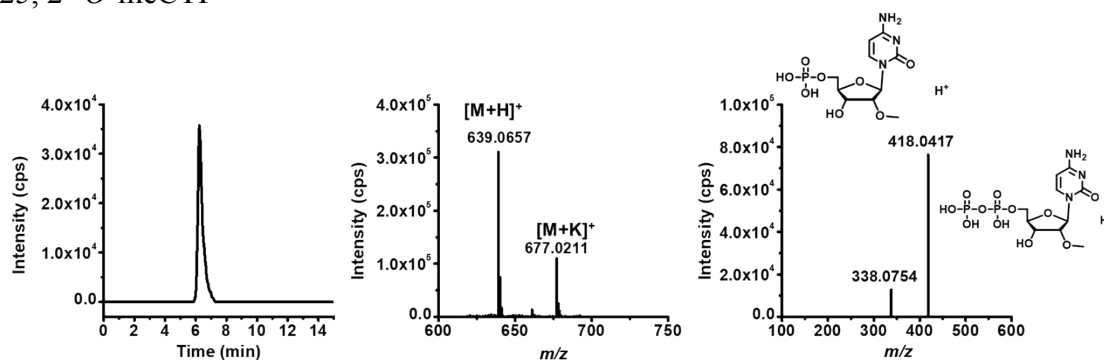

## 26, 5-caseUTP;

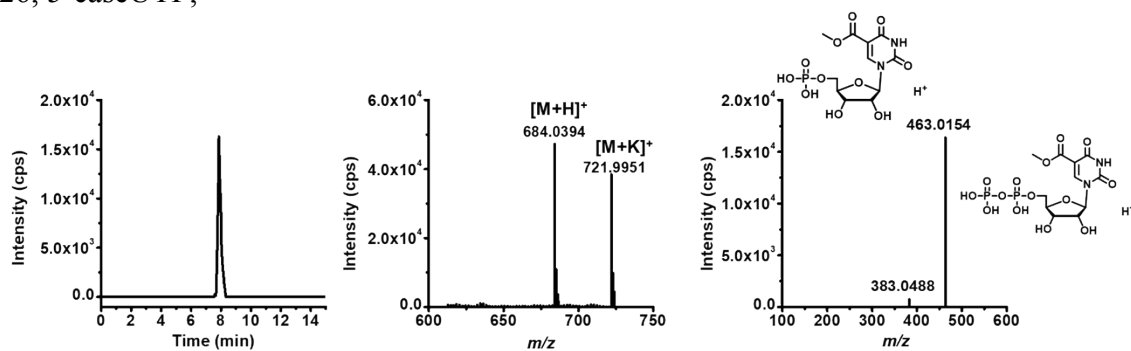

## 27, N<sup>6</sup>-medATP

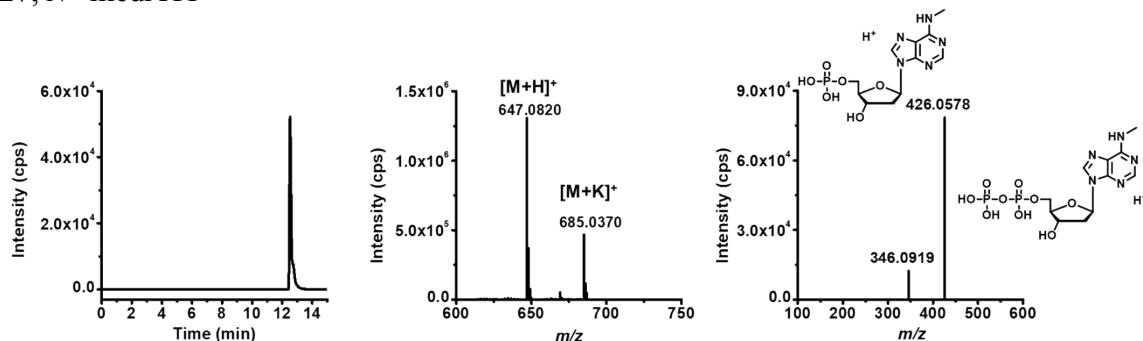

28, *N*<sup>4</sup>-medCTP

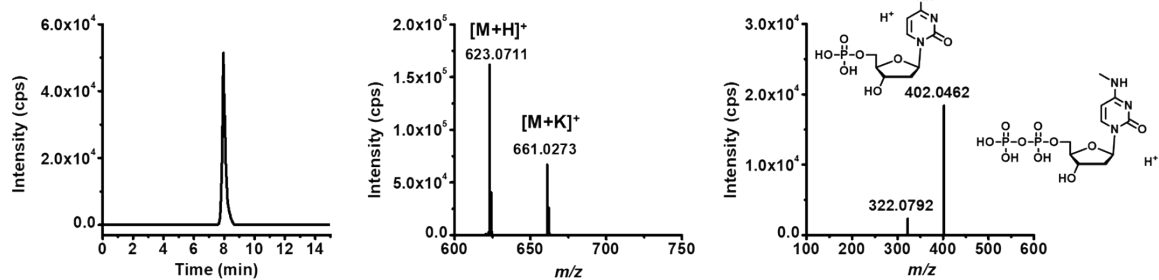

29, 2'-*O*-meYTP

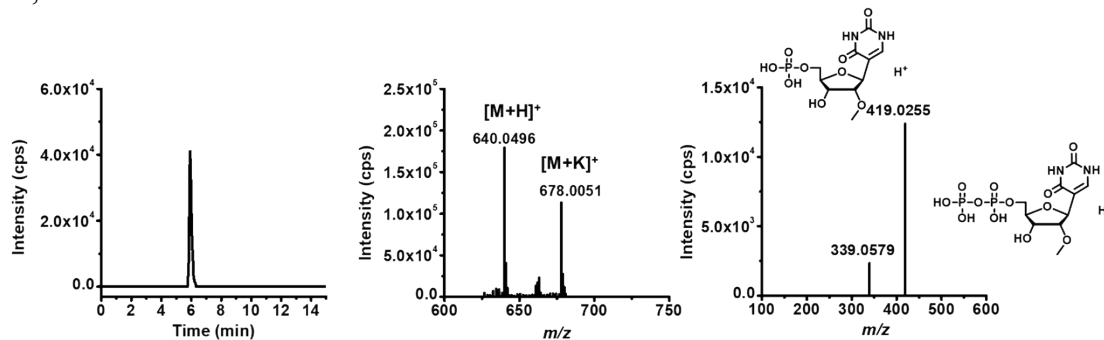

30, 2'-*O*-meUTP

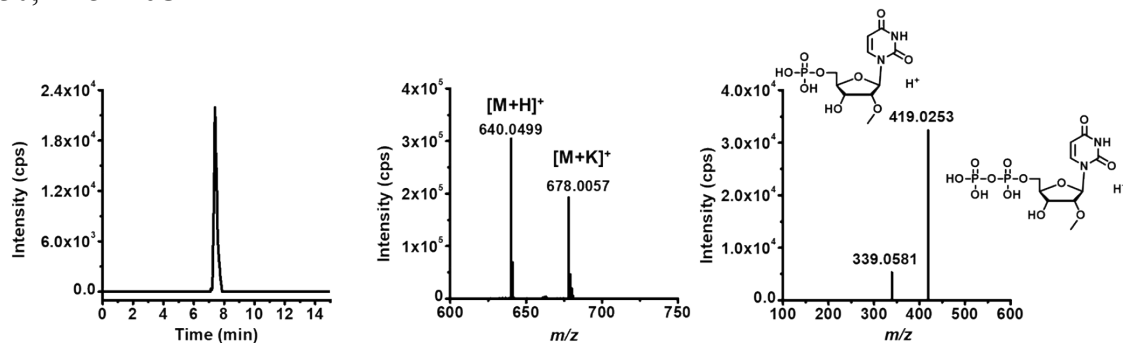

31, 5-fodCTP

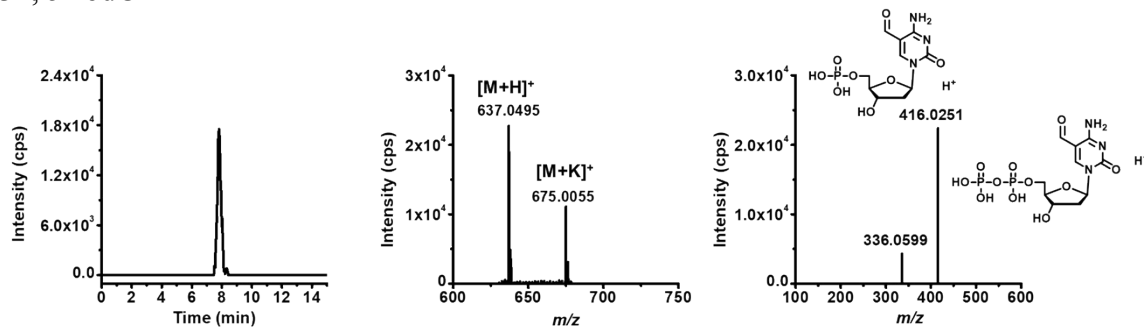

### 32, 5-foCTP

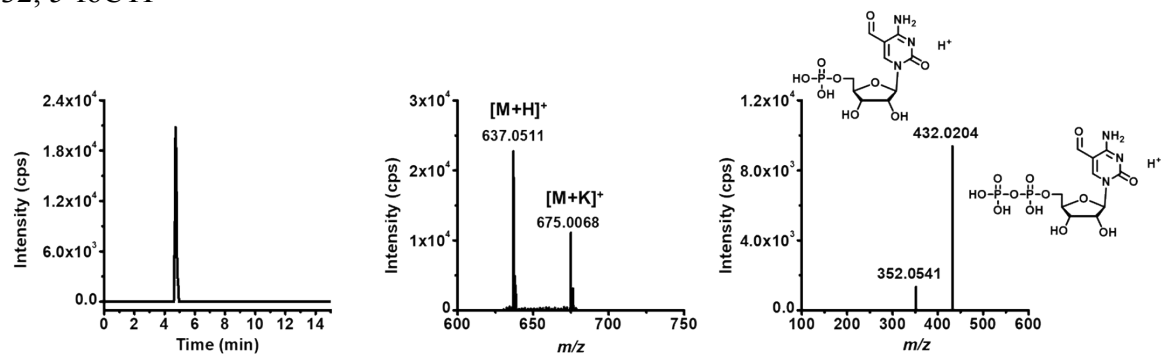

### 33, *O*<sup>6</sup>-meGTP

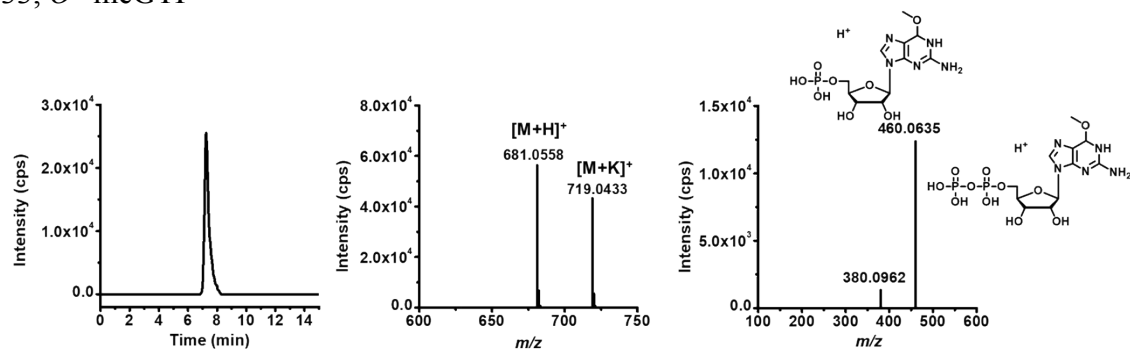

### 34, *N*<sup>1</sup>-meGTP

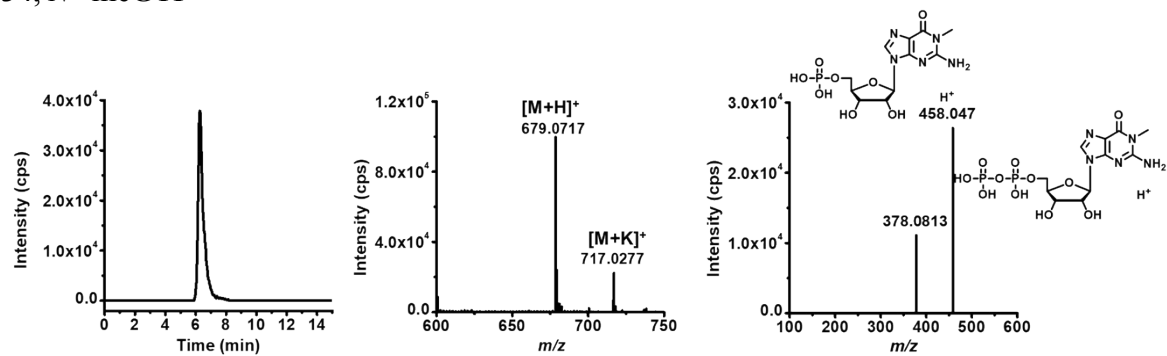



**Figure S6.** The mass spectra of ATP and dATP after 8-DMQ labeled. No additional peaks (double or triple labeling) were observed in these spectra, suggesting that only one phosphate group of NTPs could be labeled by 8-DMQ.

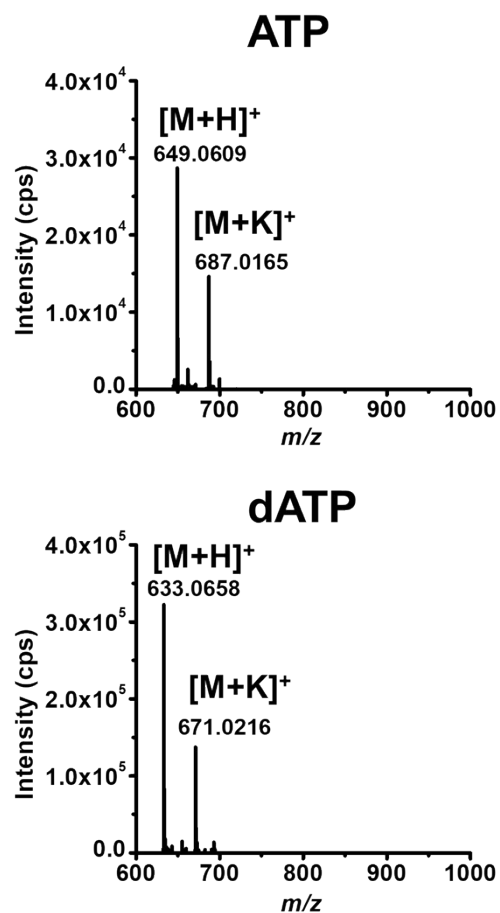

**Figure S7.** Evaluation of the stabilities of native NTPs and 8-DMQ-labeled NTPs (8-MQ-NTPs). NTPs and 8-MQ-NTPs were stored at 25°C for evaluation of the stabilities. The NTPs and 8-MQ-NTPs were analyzed by LC-ESI-MS/MS at the time points of 0.5 h, 1 h, 2 h, 5 h, and 10 h. 5 mM of NTPs were used for the evaluation.

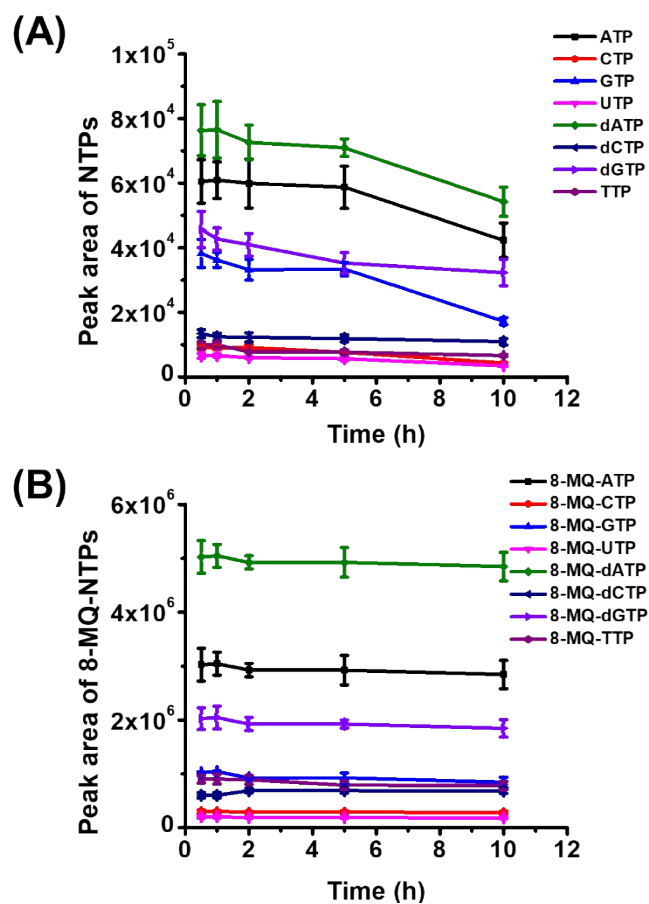

**Figure S8.** Optimization of reaction conditions of NTPs (8 canonical NTPs) by 8-DMQ. (A) Optimization of molar ratios of 8-DMQ over NTPs. (B) Optimization of reaction temperature. (C) Optimization of reaction time.

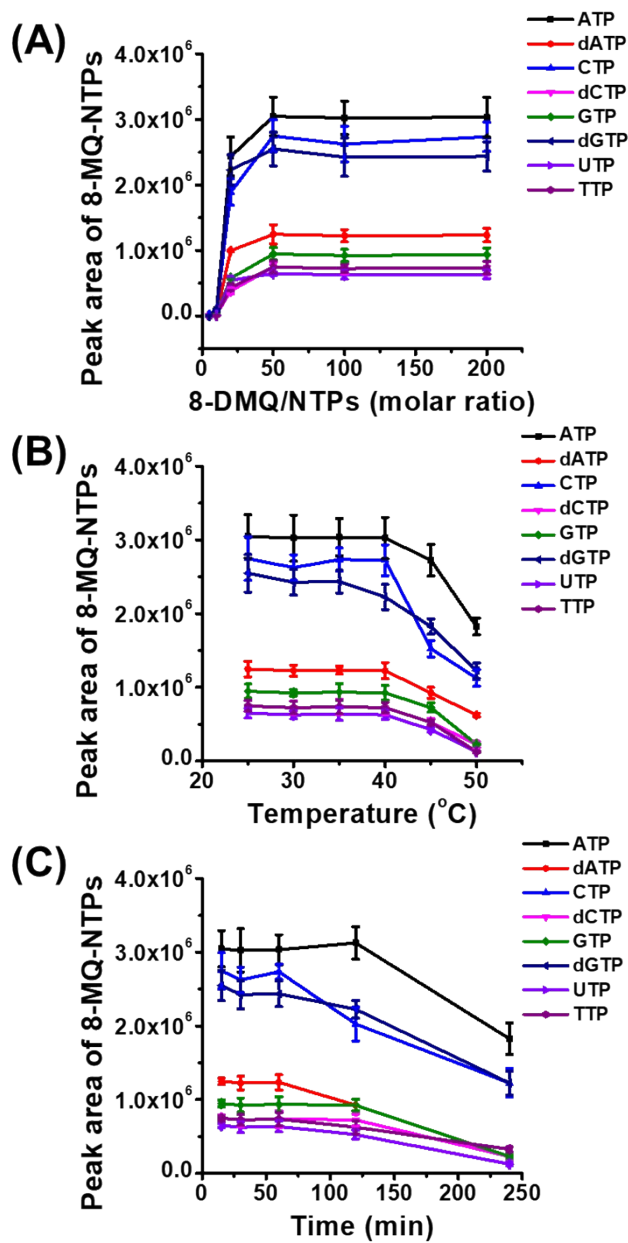

**Figure S9.** Evaluation of the chemical labeling reaction of NTPs by 8-DMQ. After 8-DMQ labeling, almost no residual NTPs were detectable, indicating the good labeling efficiencies by 8-DMQ.

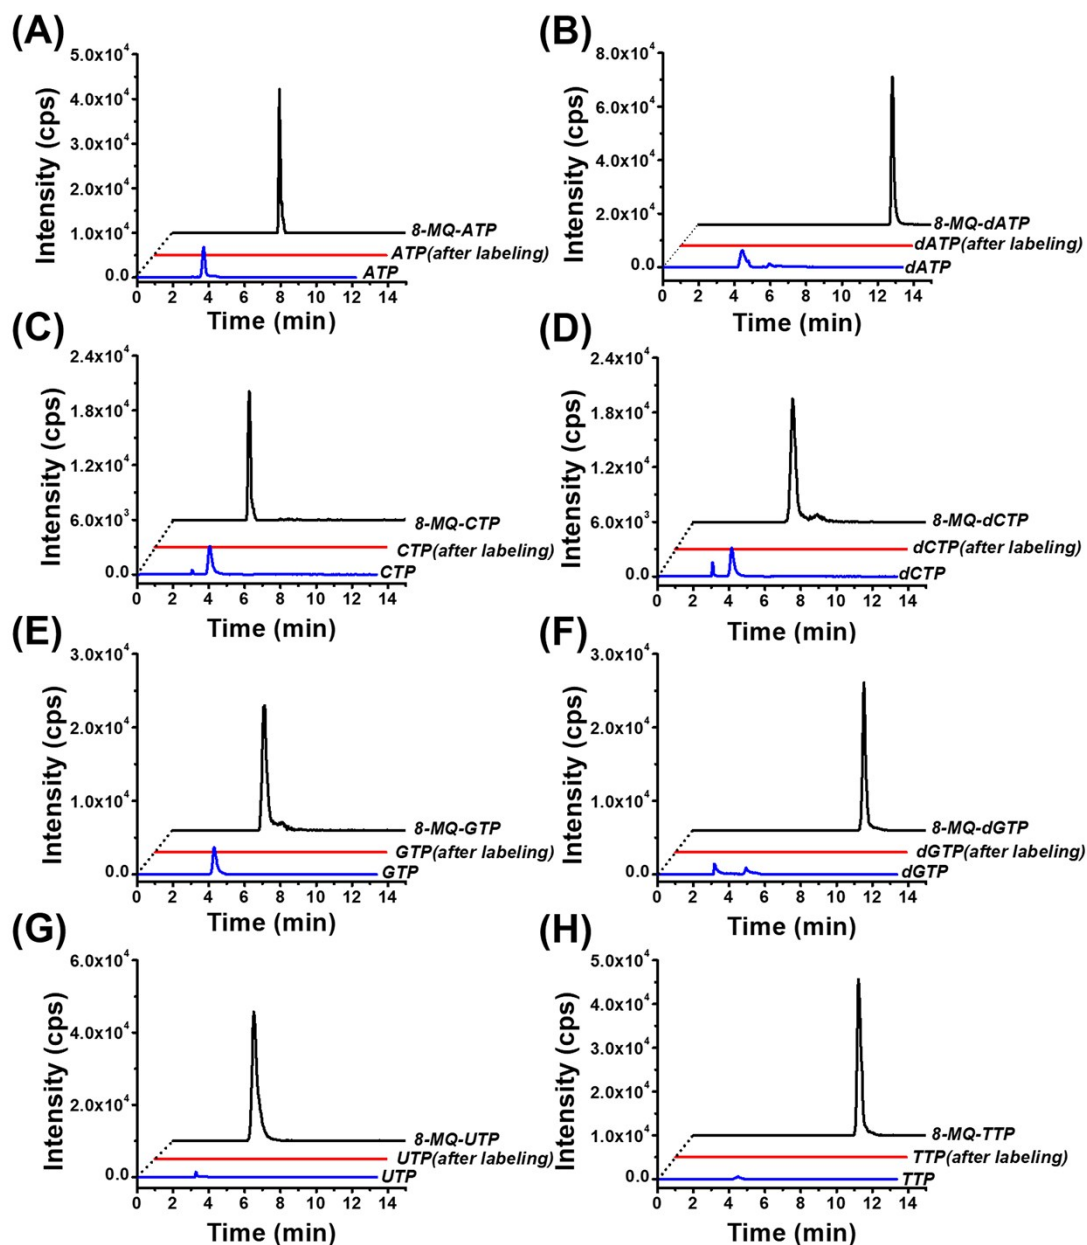

**Figure S10.** Identification of modified NTPs and canonical NTPs in 293T cells. (A) The extracted ion chromatograms (left panel), high-resolution MS spectra (middle panel) and product ions spectra (right panel) of standards. (B) The extracted ion chromatograms (left panel), high-resolution MS spectra (middle panel) and product ions spectra (right panel) of the compounds detected in 293T cells.

1. ATP

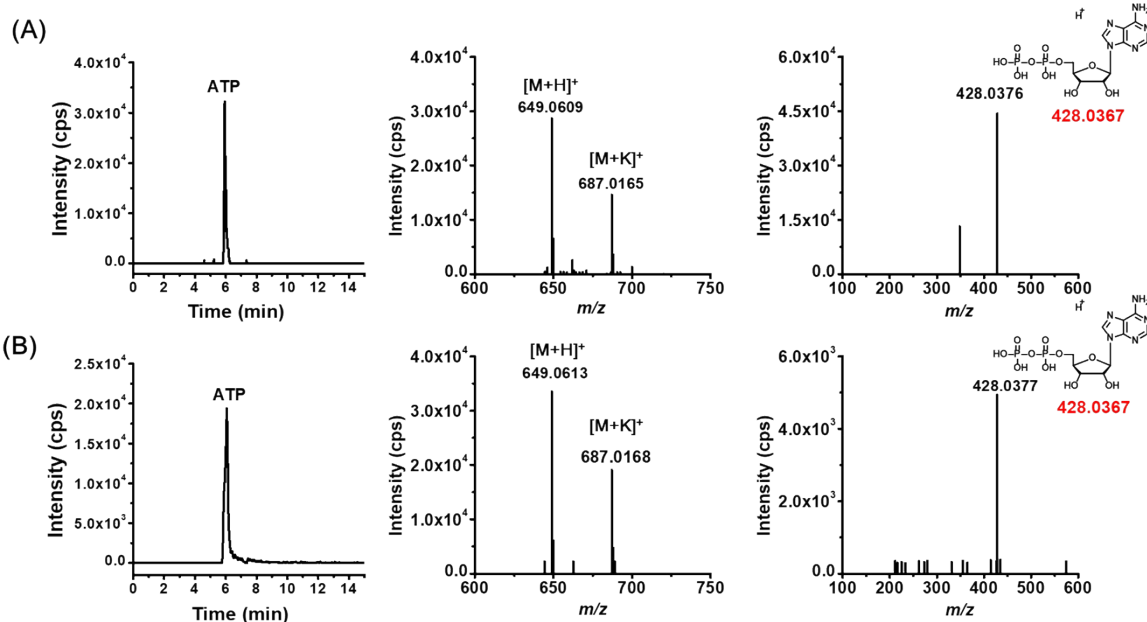

2. dATP

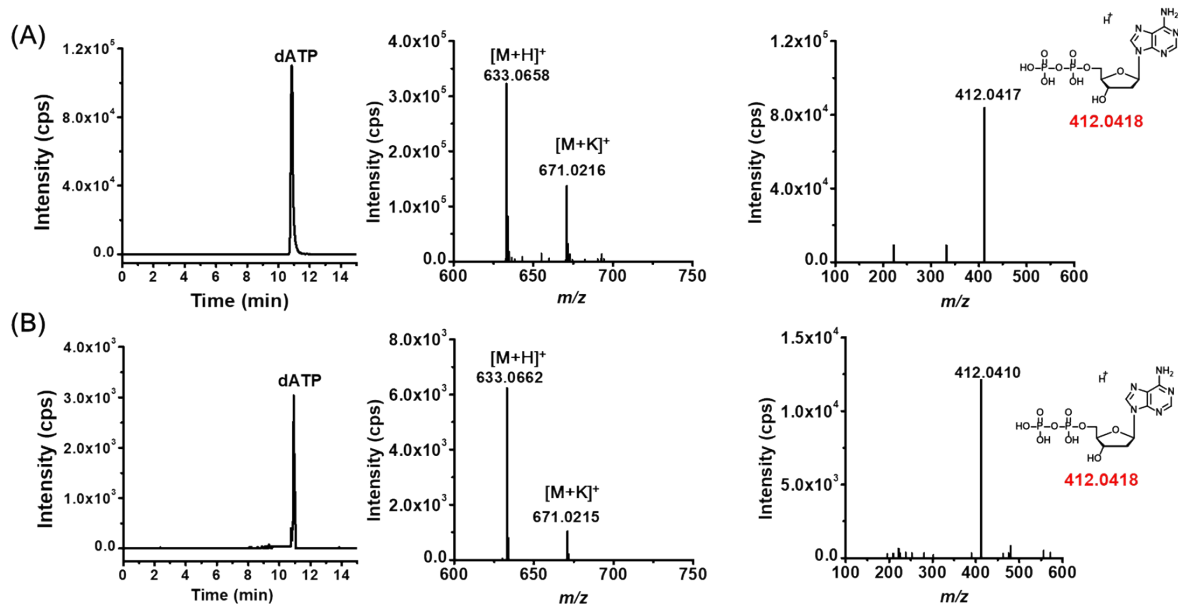

### 3. GTP

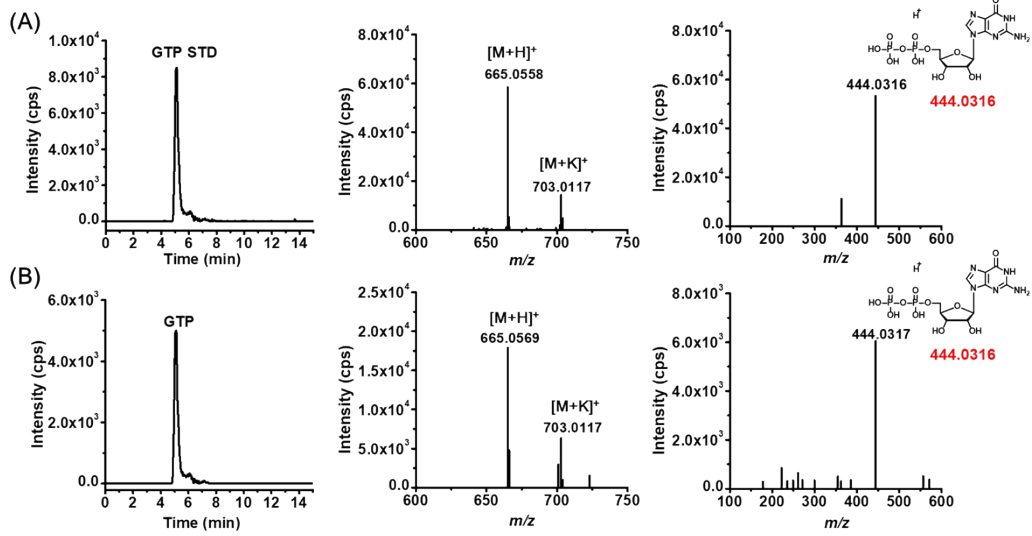

### 4. dGTP

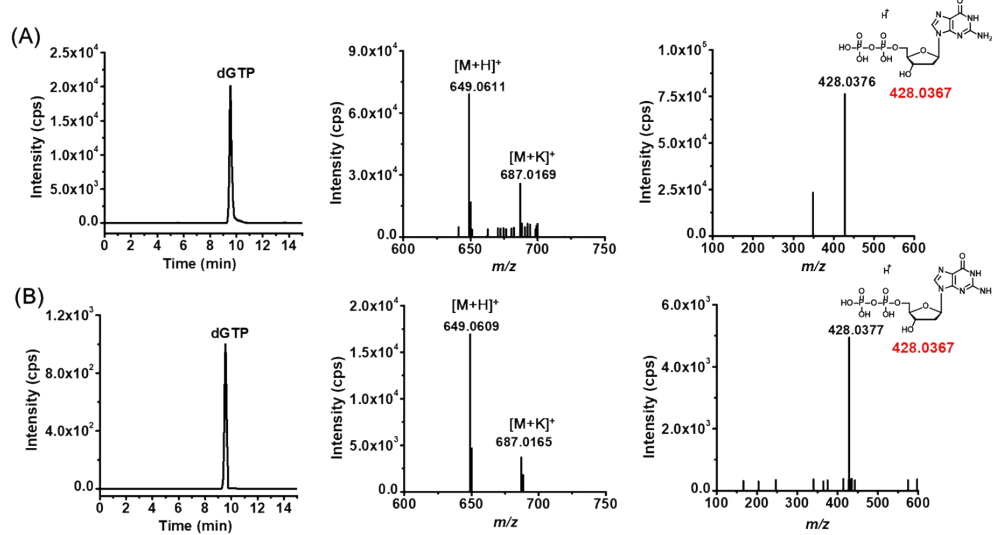

### 5. CTP

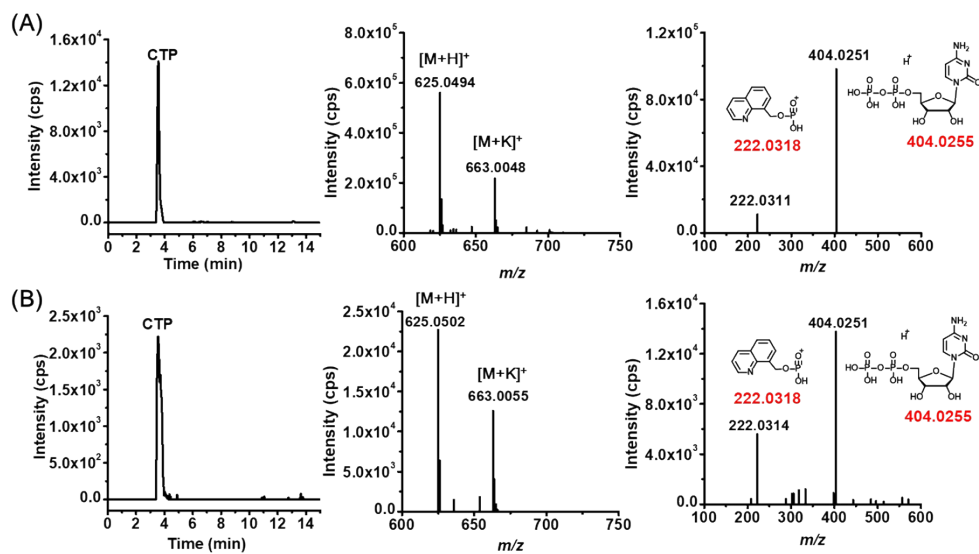

## 6. dCTP

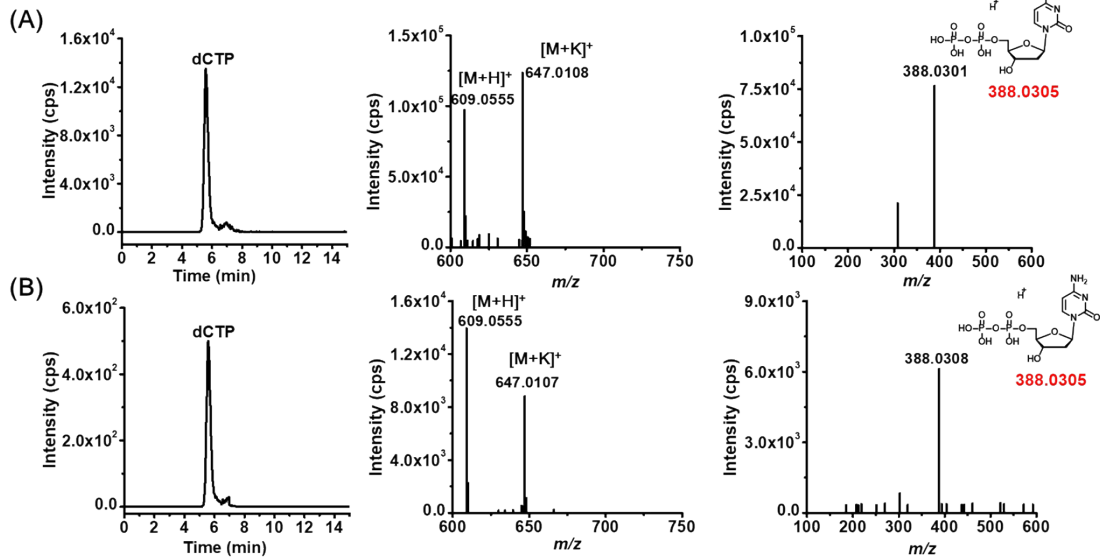

## 7. UTP

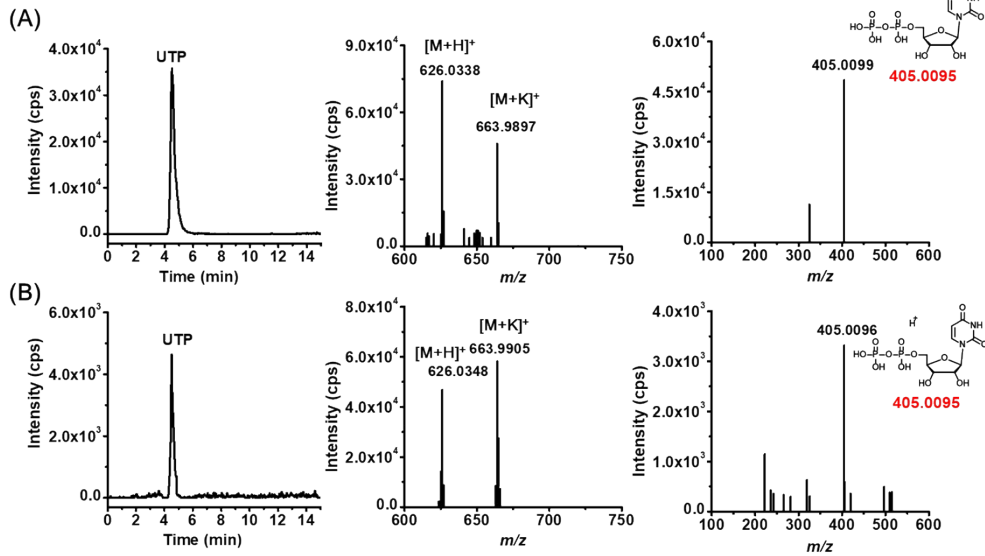

## 8. TTP

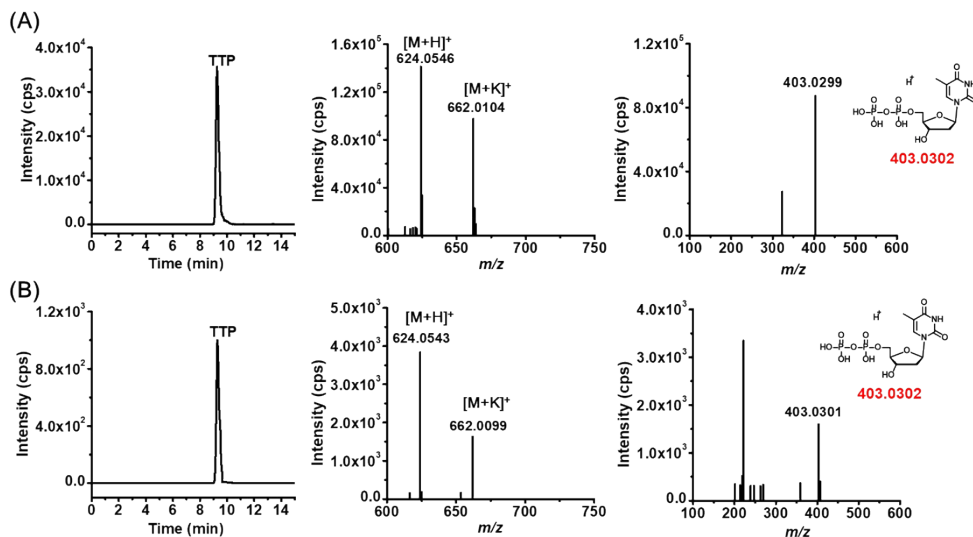

9. *N*<sup>6</sup>-meATP

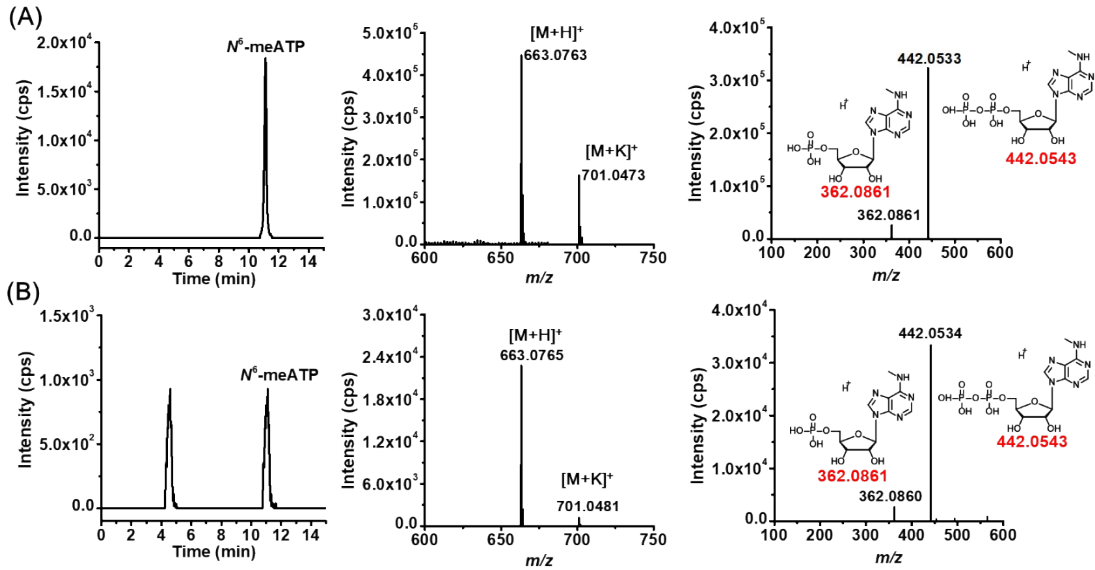

10. 7-meGTP

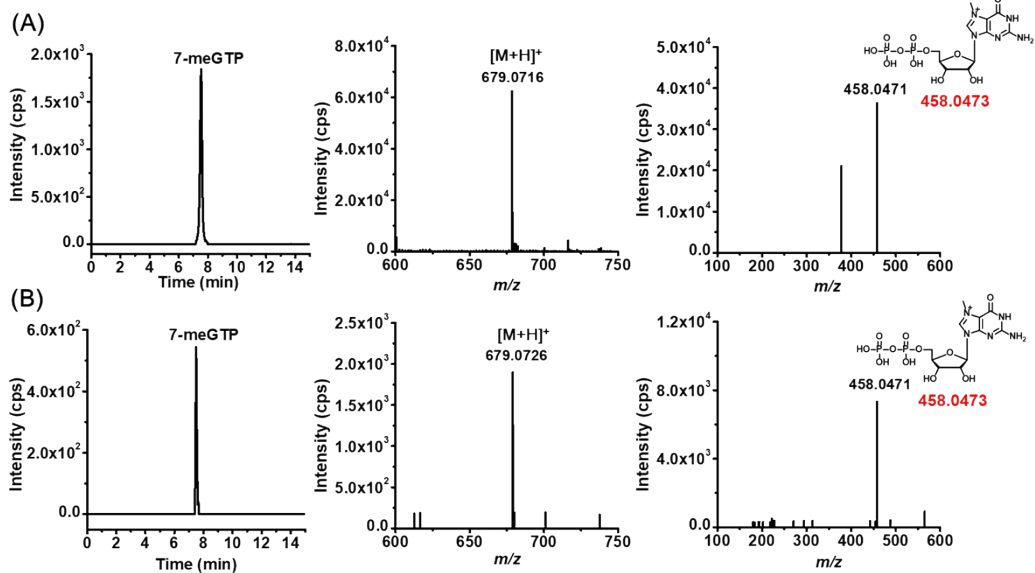

11. ITP

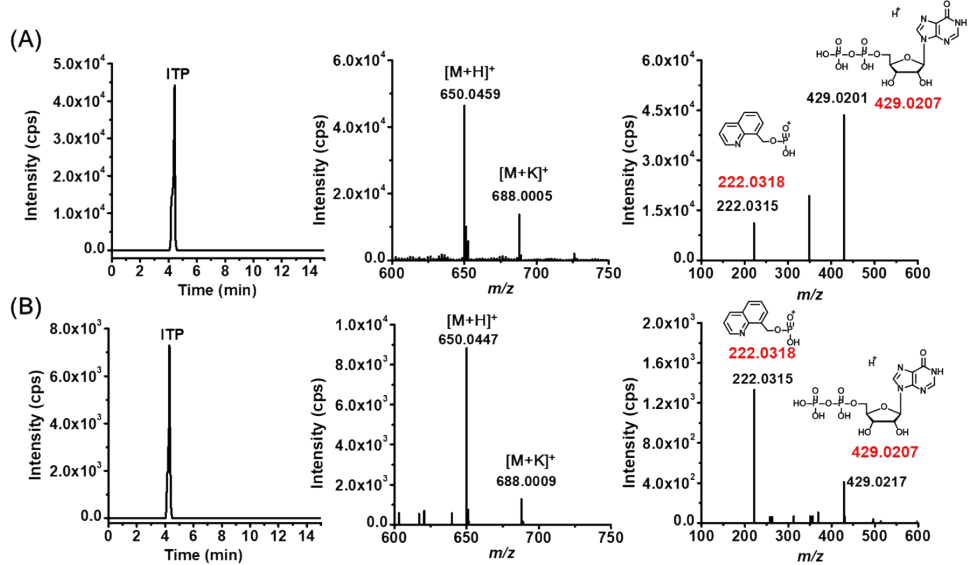



12. XTP

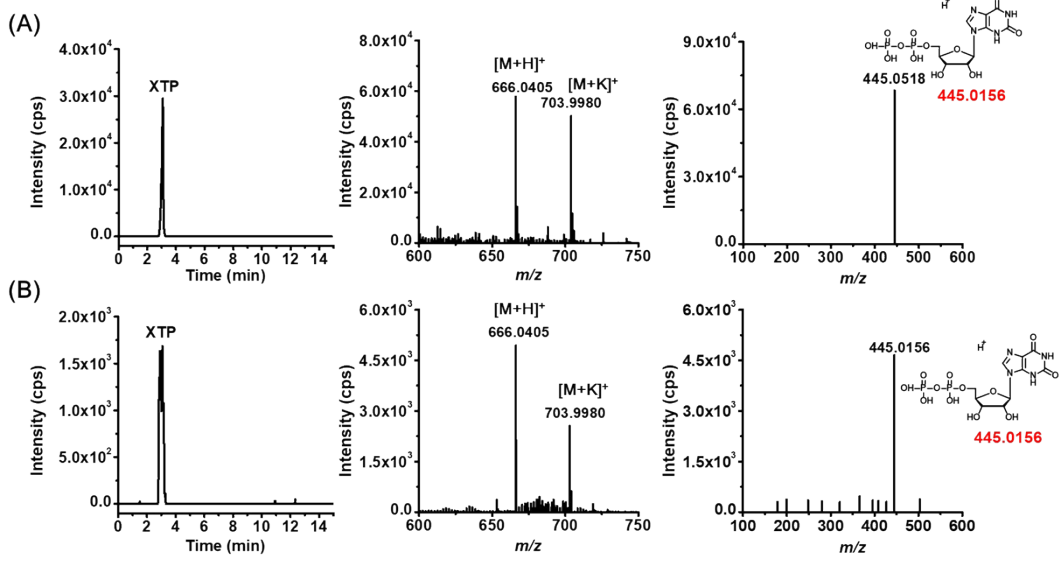

13.  $N^1$ -meATP

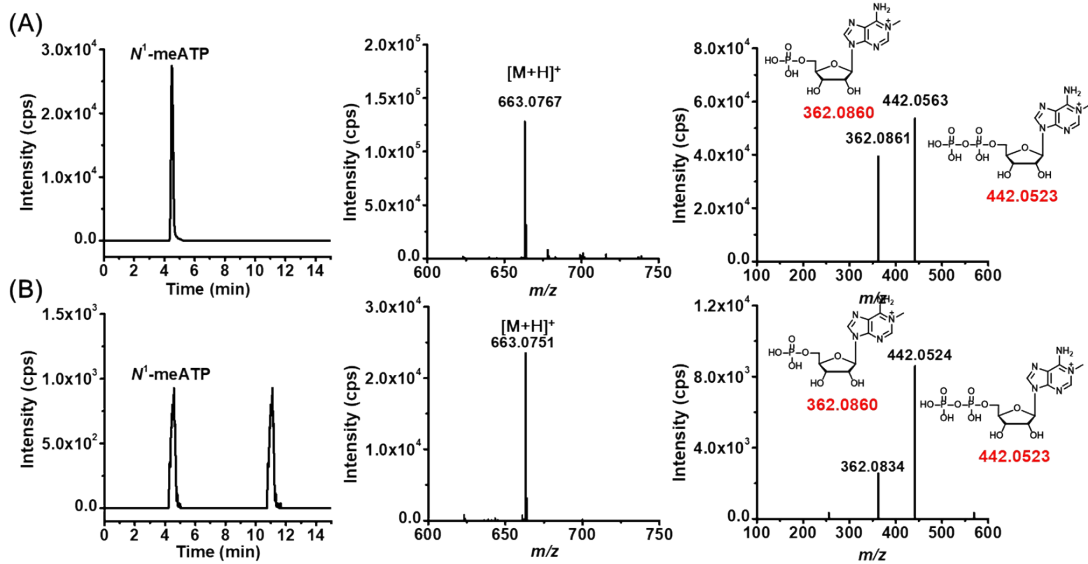

14. 2-S-UTP

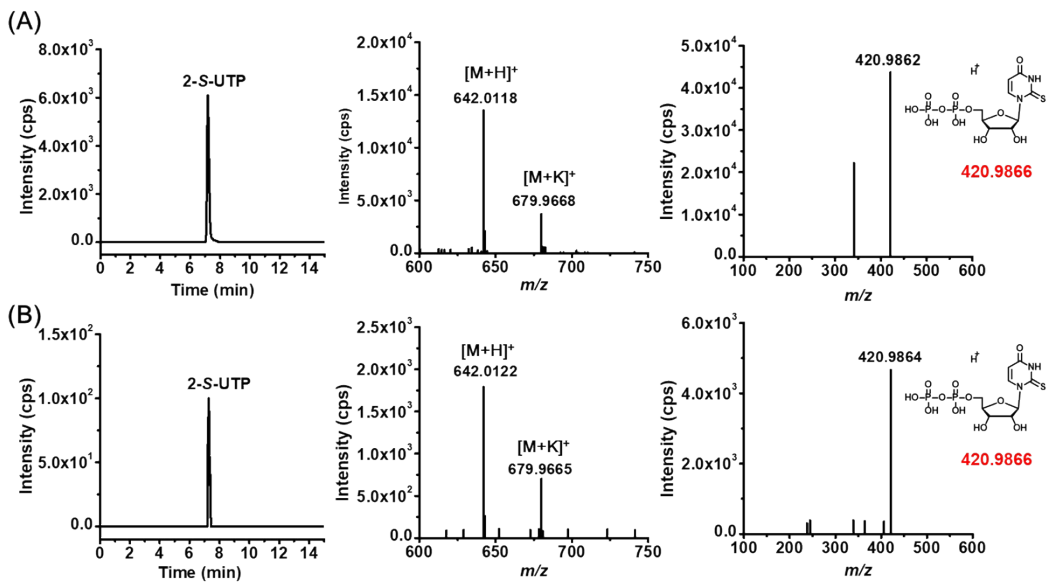

15. 5-hmCTP

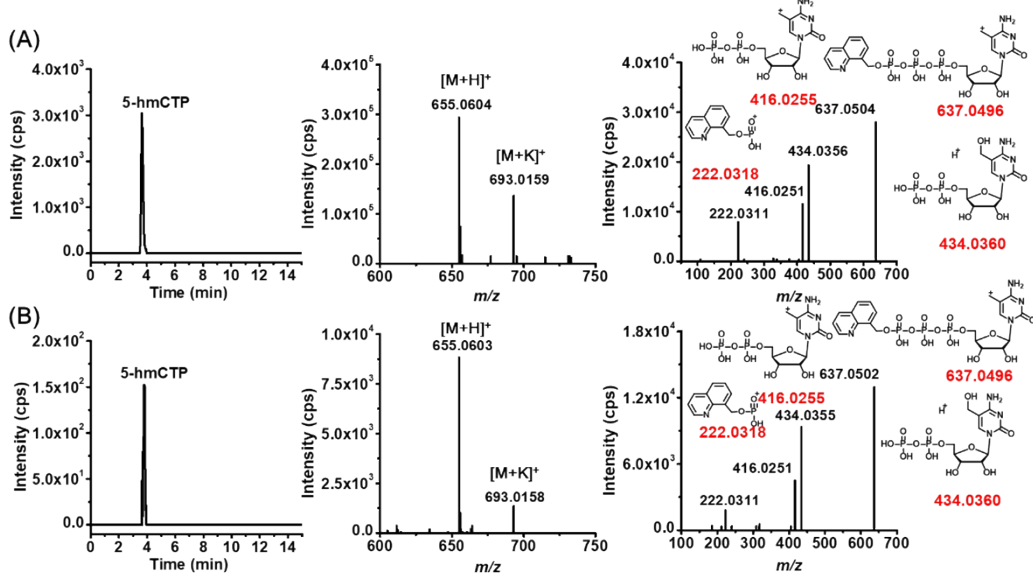

16. 5-hmdCTP

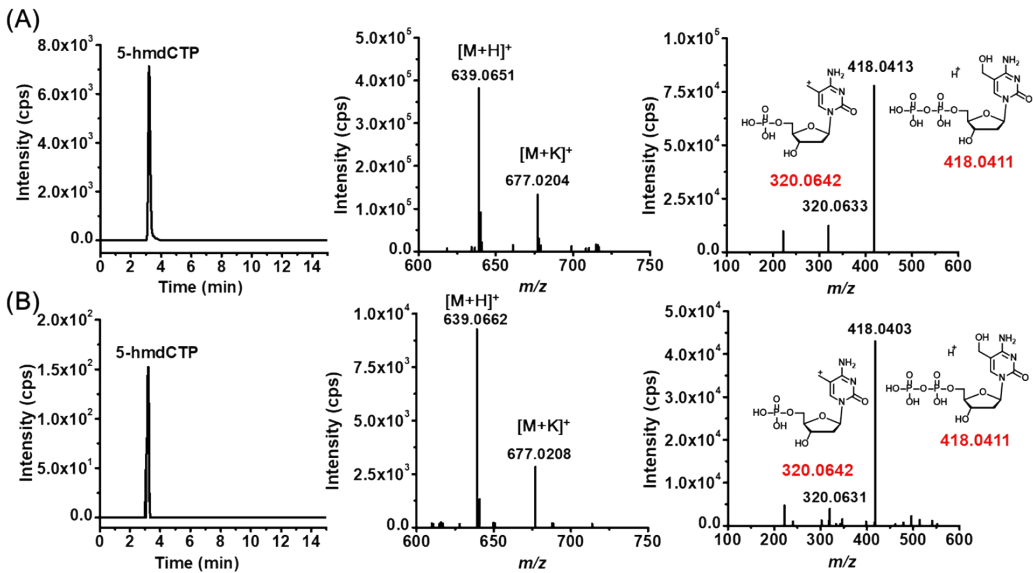

17. 2'-O-meATP

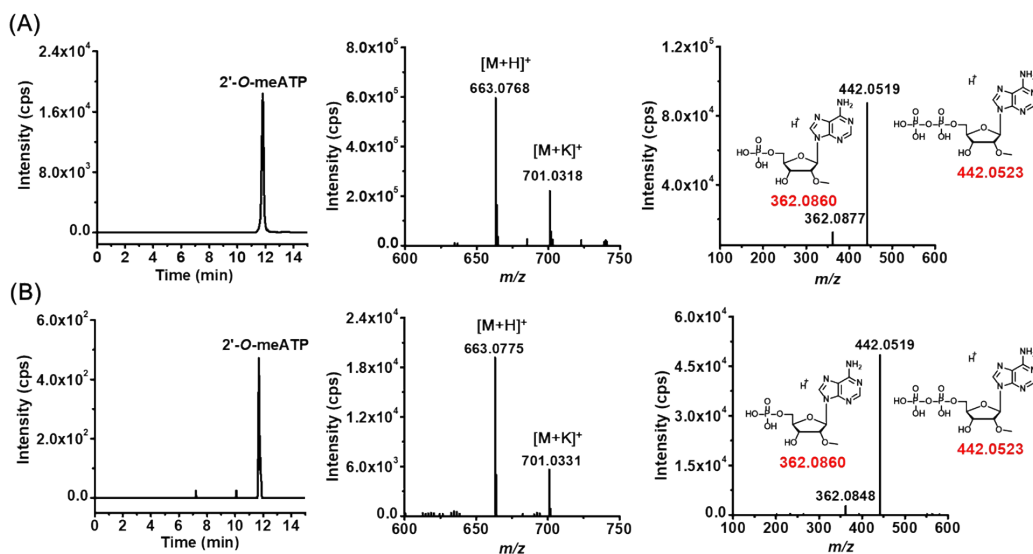

18. 2'-O-meGTP

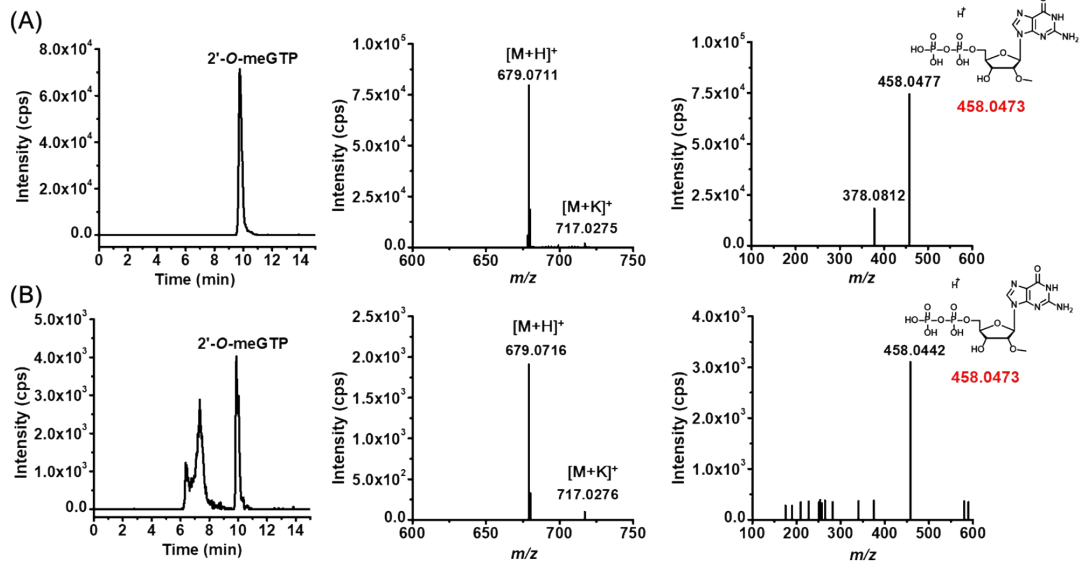

**Figure S11.** Schematic illustration of the stable isotope tracing monitored by mass spectrometry. Cells were maintained in L-methionine-free DMEM-KO medium with added D<sub>3</sub>-Met. D<sub>3</sub>-Met can be converted into CD<sub>3</sub>-S-adenosyl-L-methionine (SAM), which serves as the methyl donor for DNA and RNA methylation. Therefore, the methyl groups of methylated nucleosides in DNA and RNA carry CD<sub>3</sub>. The detectable endogenous methylated NTPs carrying CD<sub>3</sub> indicates that they derive from the degradation of nucleic acids.

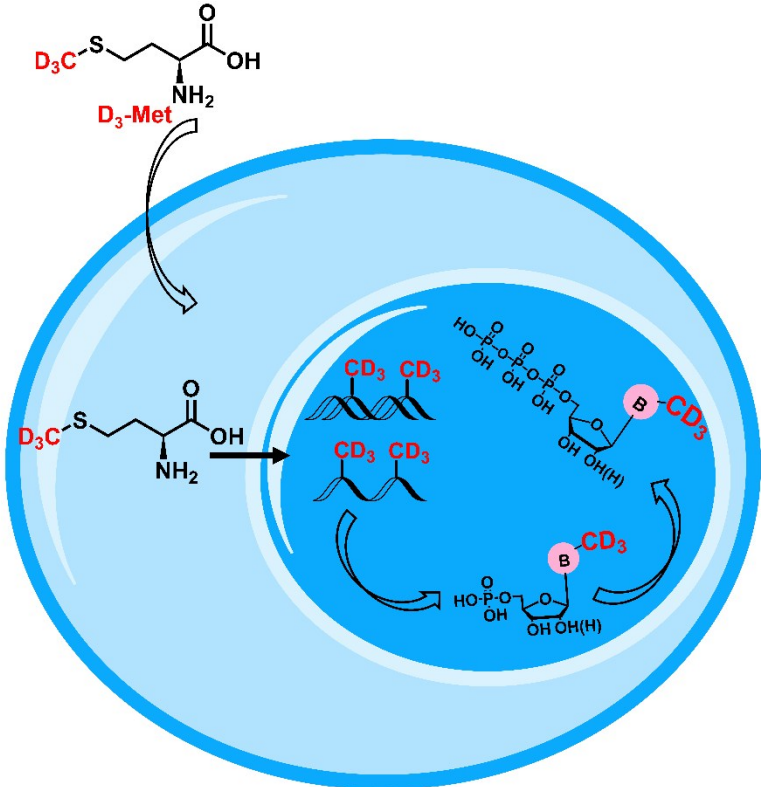

**Figure S12.** Evaluation of the stable isotope labeling efficiency by using D<sub>3</sub>-Met cultured 293T cells. (A) Extracted ion chromatograms of m<sup>1</sup>A, Am, m<sup>6</sup>A, CD<sub>3</sub>-m<sup>1</sup>A, CD<sub>3</sub>-Am and CD<sub>3</sub>-m<sup>6</sup>A after D<sub>3</sub>-Met labeling. (B) Extracted ion chromatograms of m<sup>7</sup>G, Gm, CD<sub>3</sub>-m<sup>7</sup>G and CD<sub>3</sub>-Gm after D<sub>3</sub>-Met labeling from RNA. (C) Extracted ion chromatograms of 5-mC and CD<sub>3</sub>-5-mC after D<sub>3</sub>-Met labeling. (D) Extracted ion chromatograms of 5-mdC and CD<sub>3</sub>-5-mdC after D<sub>3</sub>-Met labeling. (E) The stable isotope labeling efficiencies by D<sub>3</sub>-Met labeling. The stable isotope labeling efficiencies were calculated by comparing the contents of the CD<sub>3</sub>-nucleosides with total CD<sub>3</sub>- and CH<sub>3</sub> nucleosides (Labeling ratio = CD<sub>3</sub>-nucleoside/(CD<sub>3</sub>-nucleoside + CH<sub>3</sub>-nucleoside)).

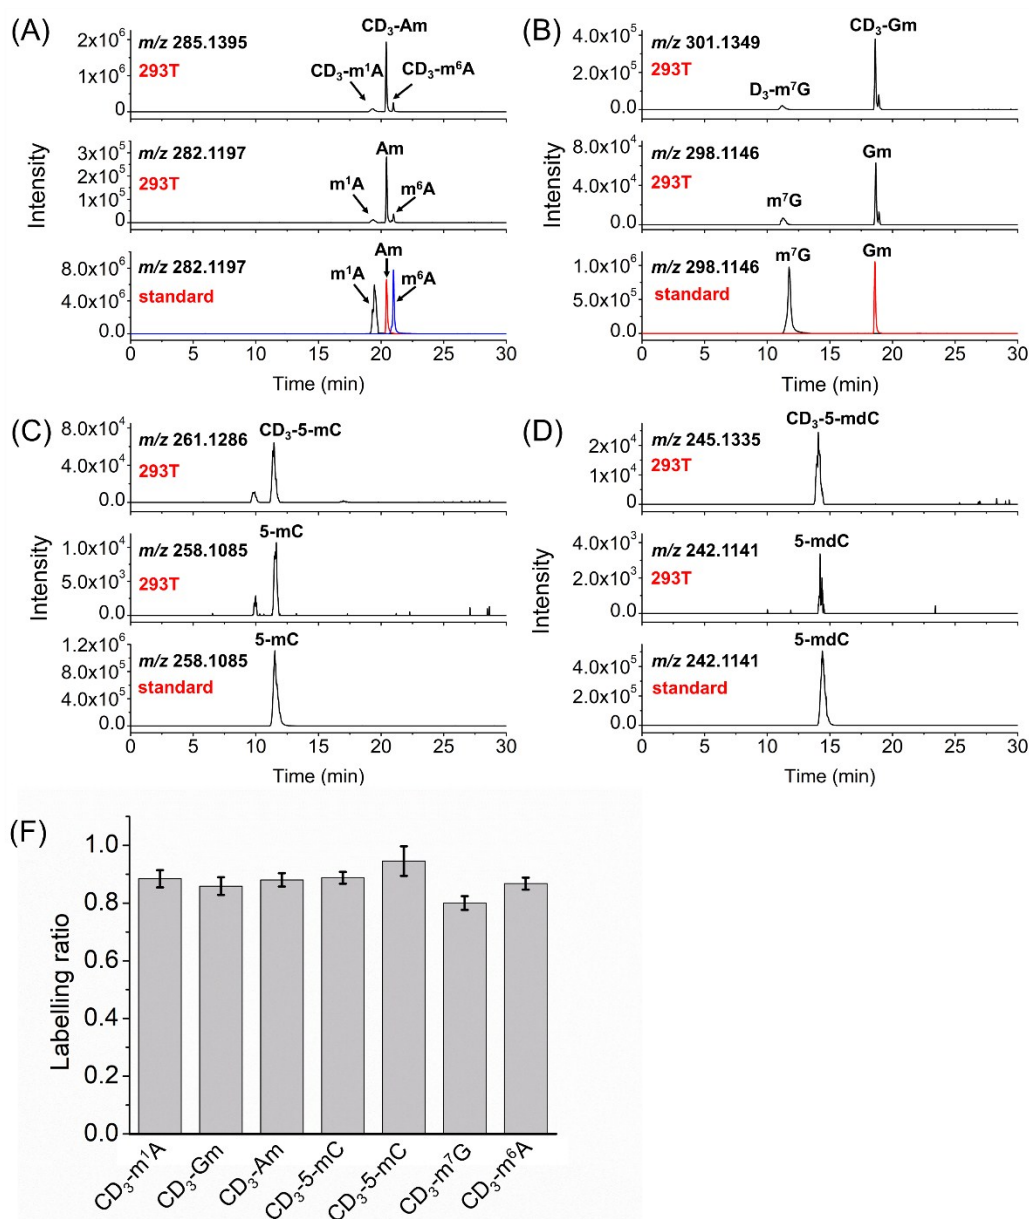

**Figure S13.** Identification of modified NMPs and NDPs in 293T cells. (A) The extracted ion chromatograms (left panel), high-resolution MS spectra (middle panel) and product ions spectra (right panel) of standards. (B) The extracted ion chromatograms (left panel), high-resolution MS spectra (middle panel) and product ions spectra (right panel) of the compounds detected in 293T cells.

### 1. ADP

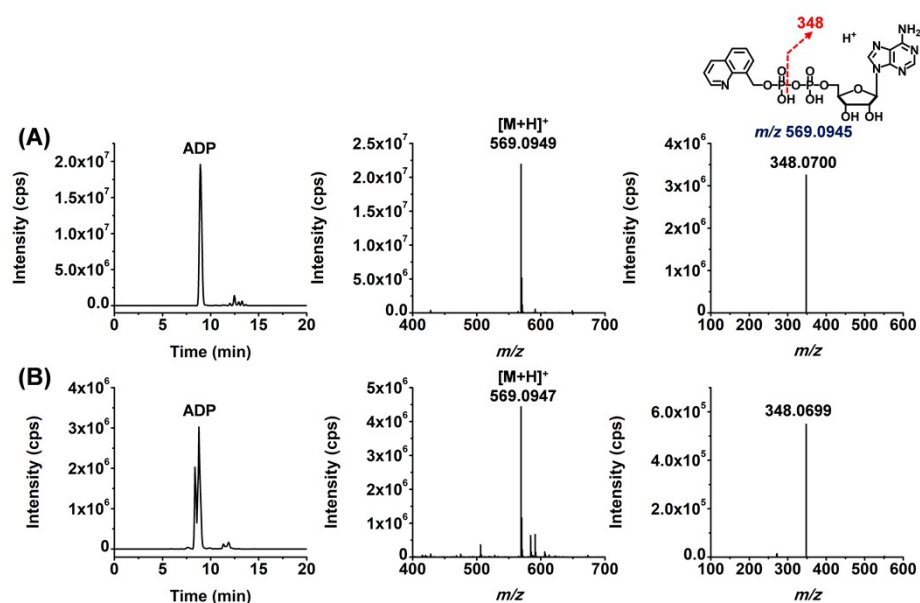

### 2. AMP

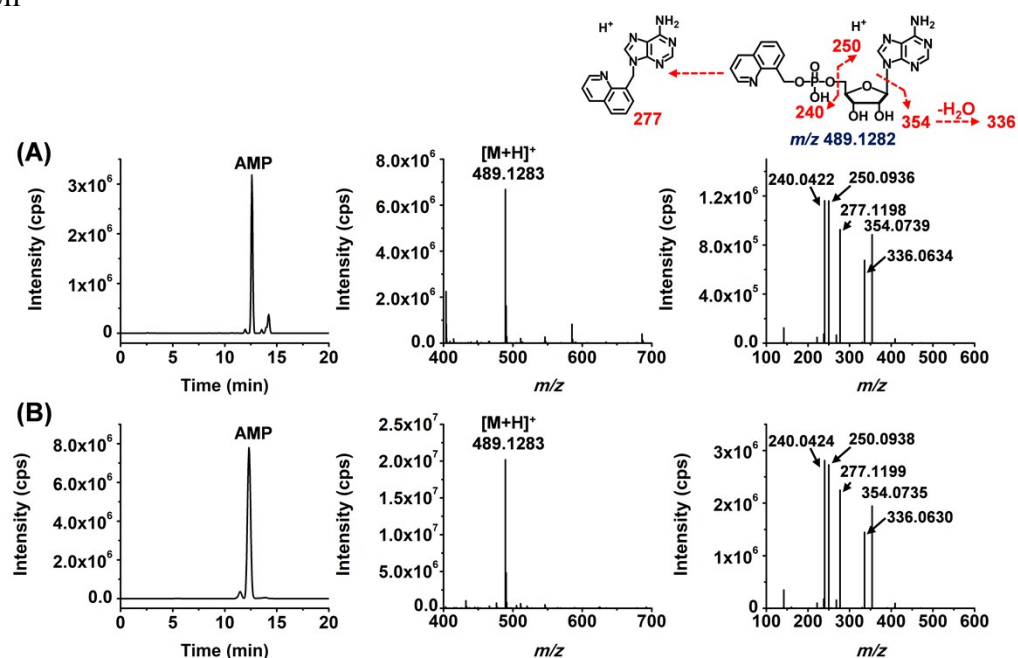

### 3. dADP

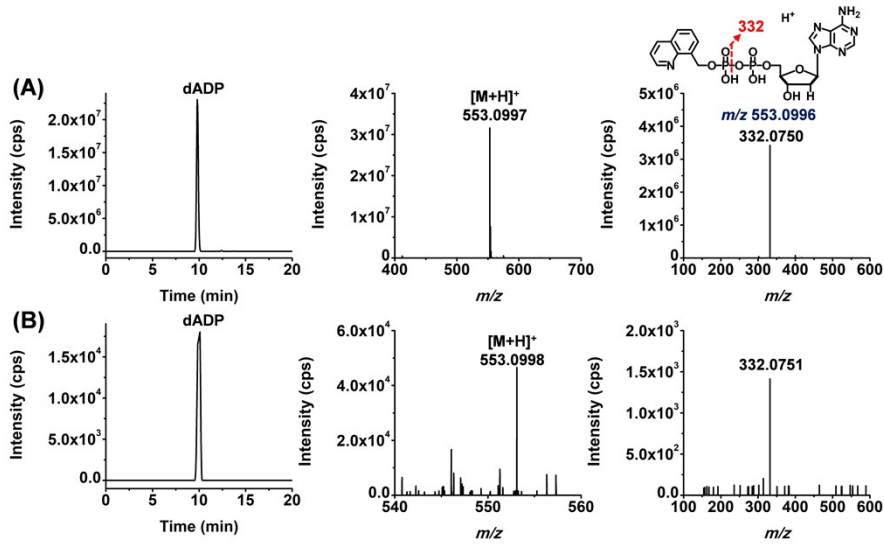

### 4. dAMP

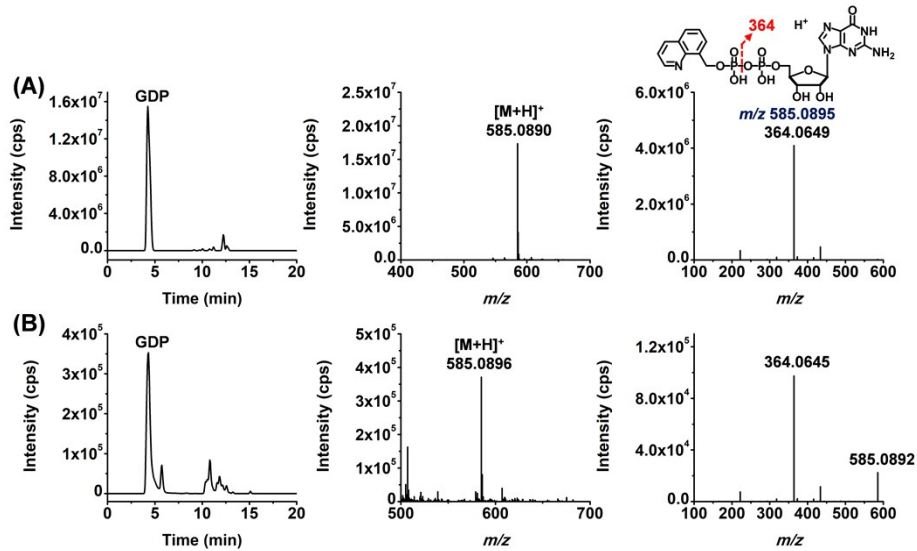

### 5. GDP

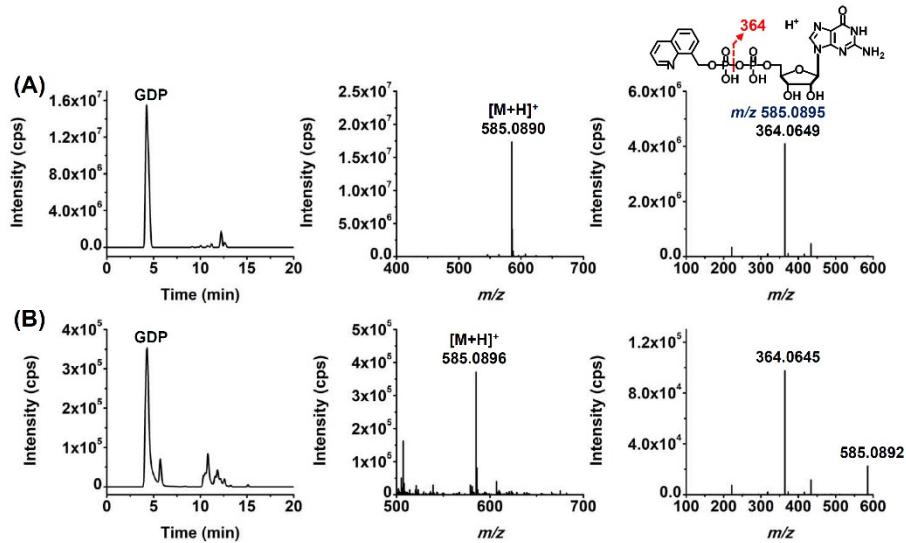

## 6. GMP

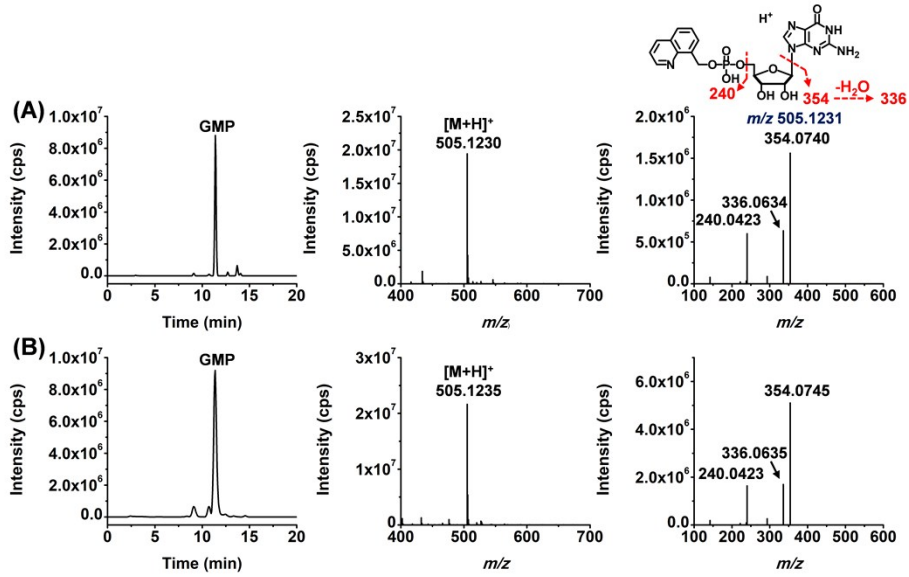

## 7. dGDP

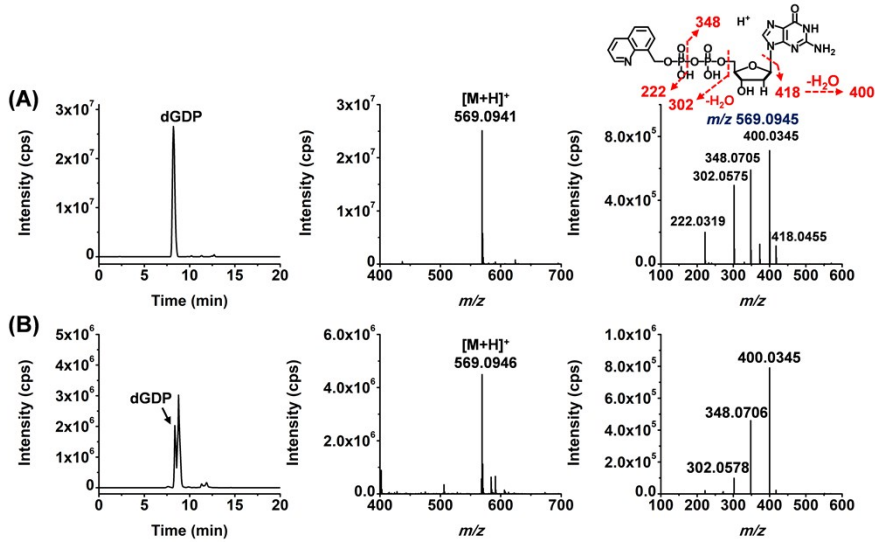

## 8. dGMP

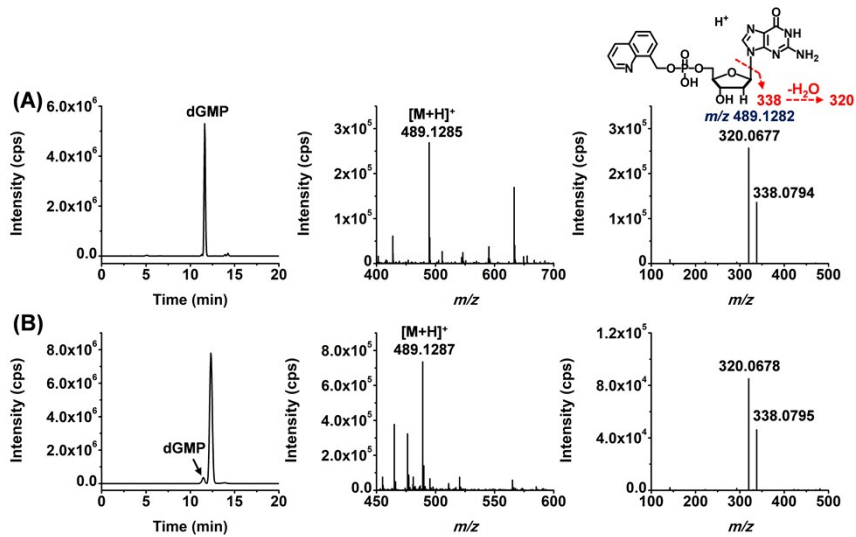



9. CDP

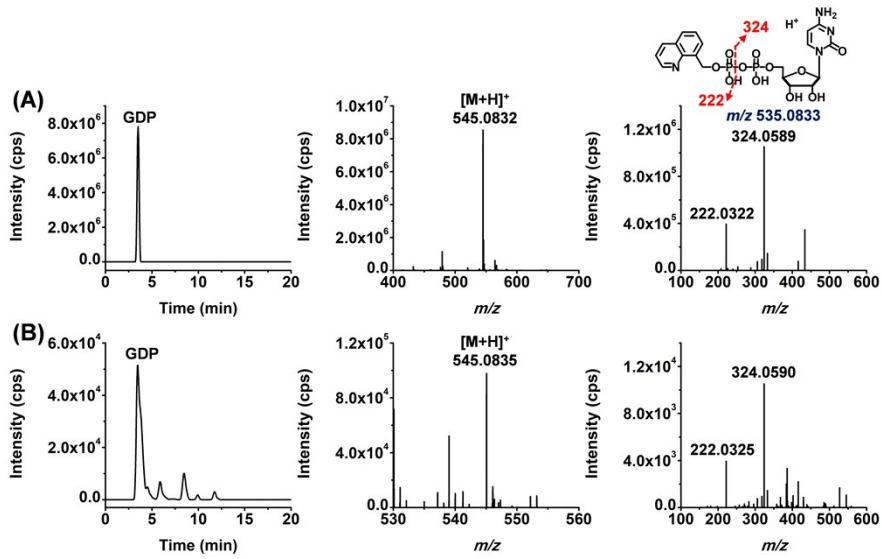

10. CMP

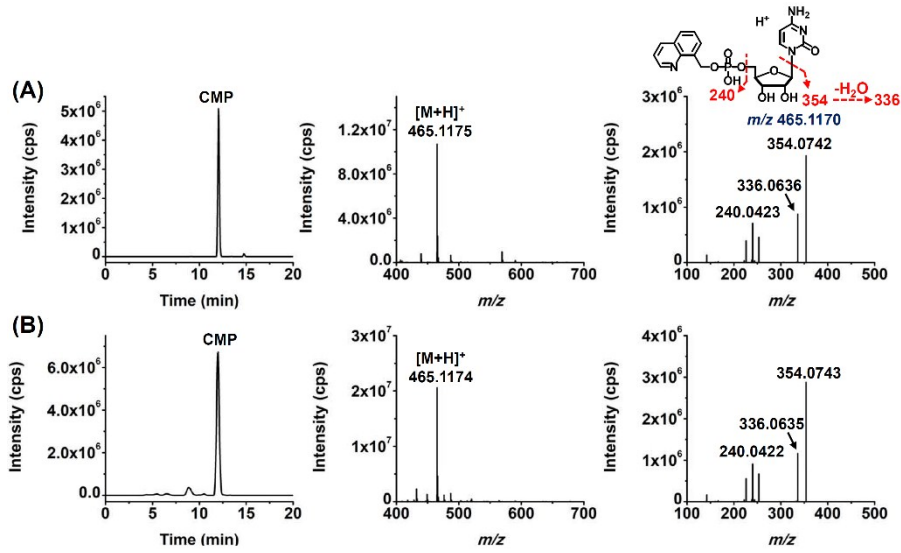

11. dCDP

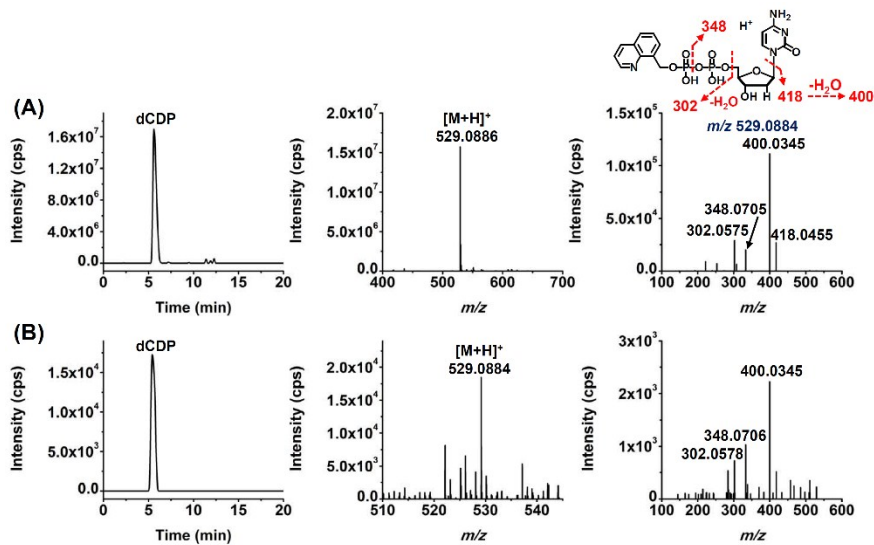

## 12. dCMP

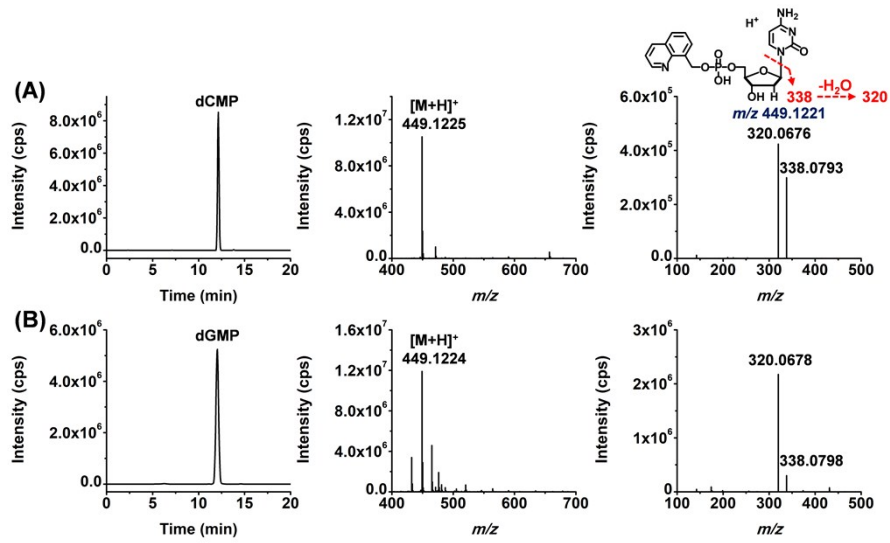

## 13. UDP

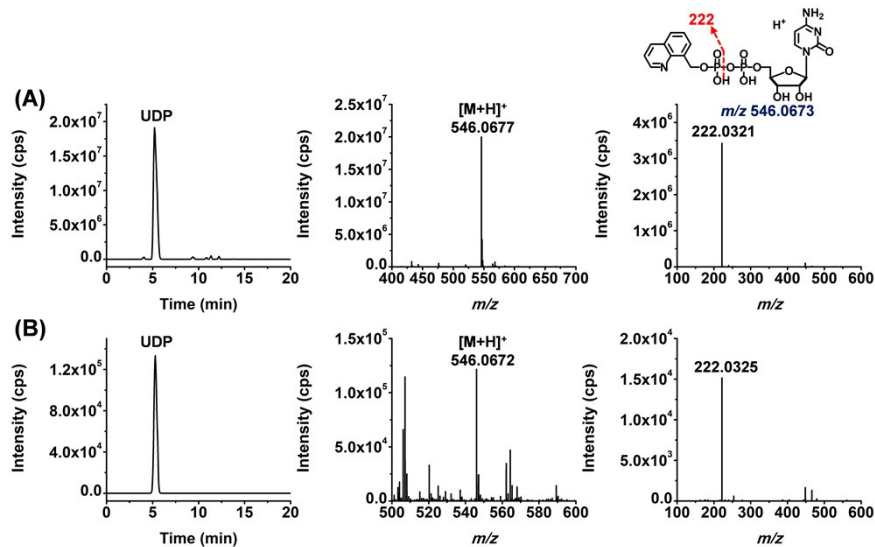

## 14. UMP

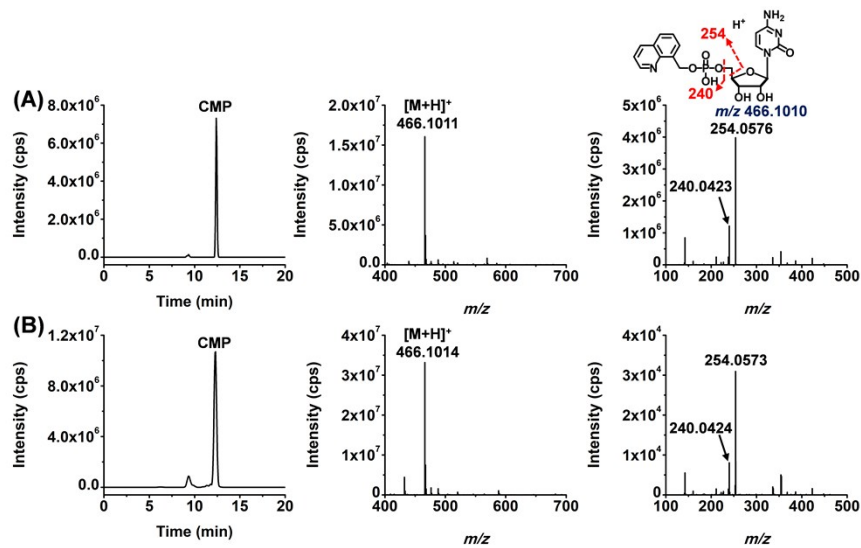

15. TDP

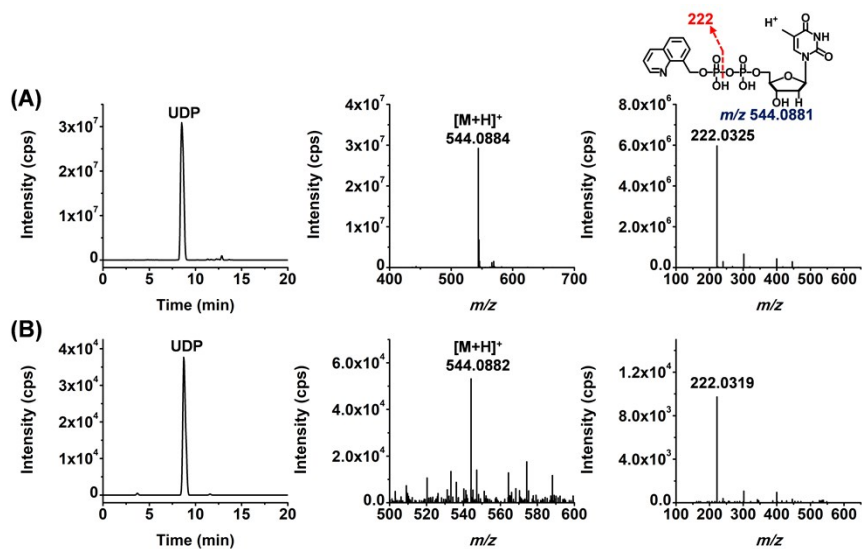

16. TMP

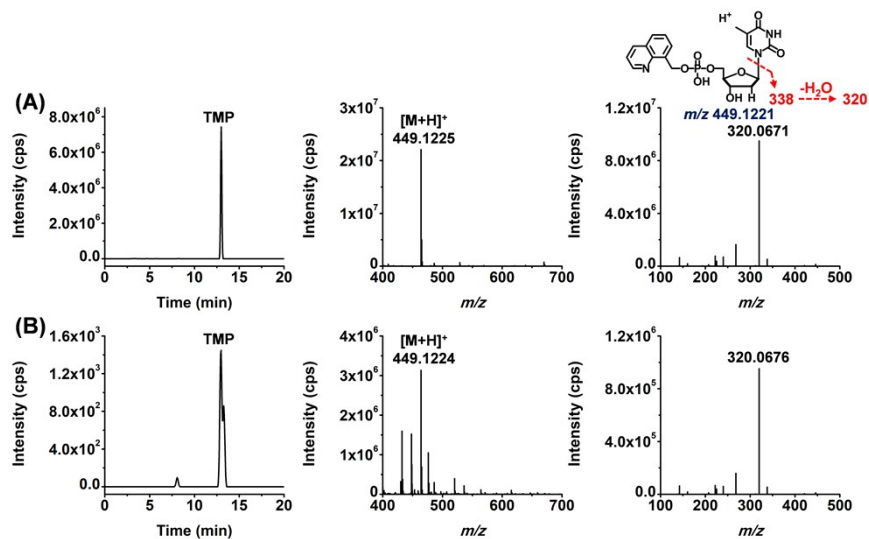

17.  $N^6$ -meADP

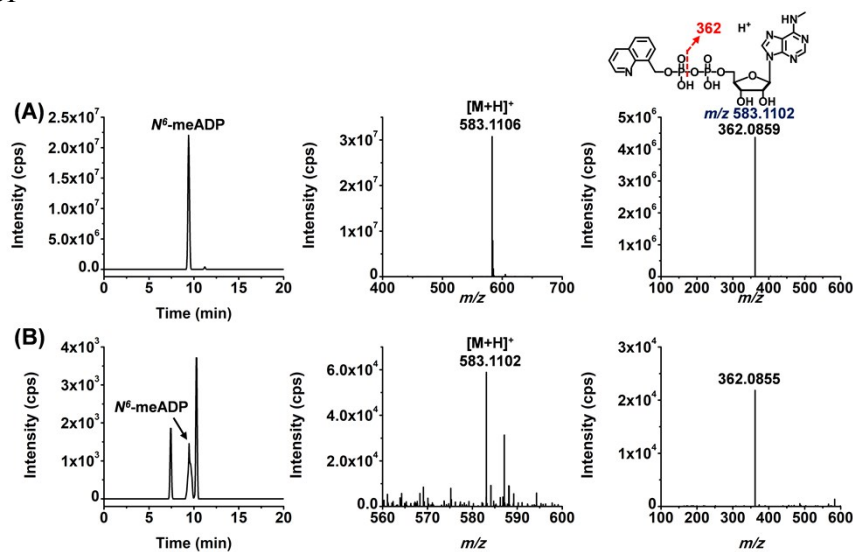

18. *N*<sup>6</sup>-meAMP

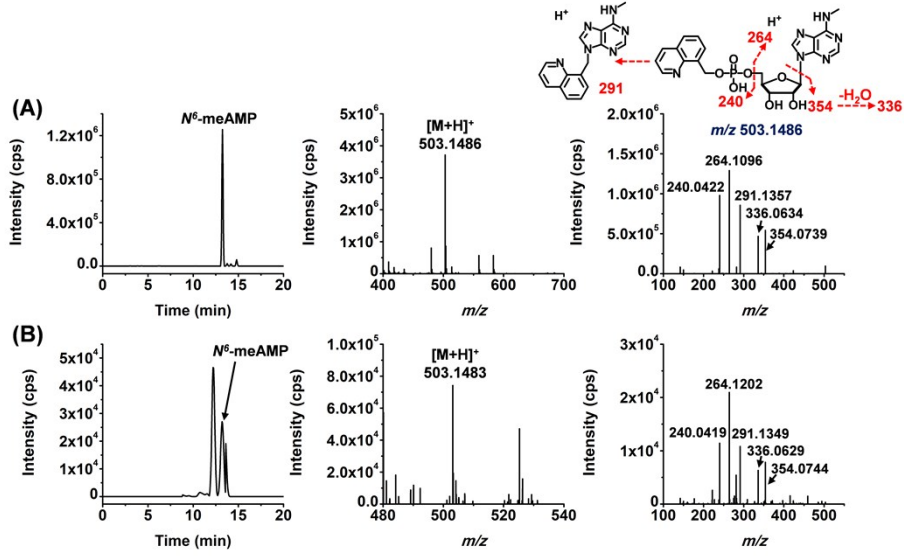

19. 7-meGDP

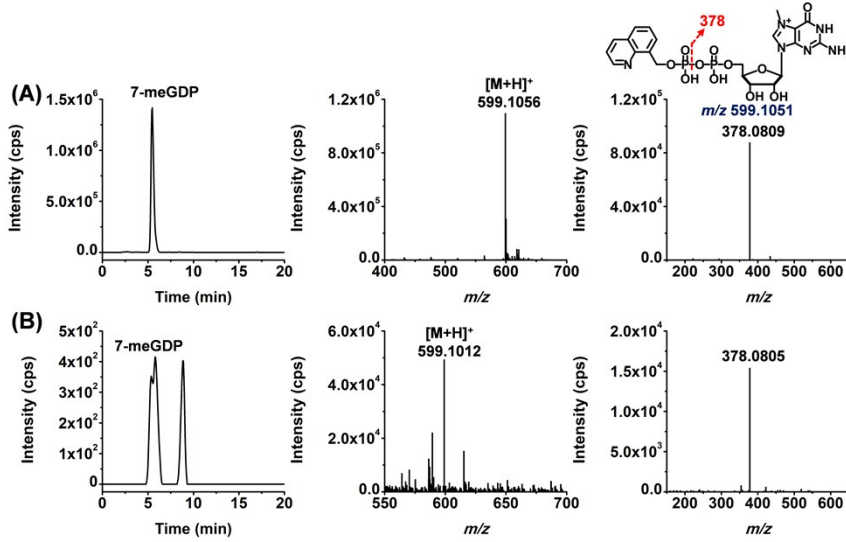

20. 7-meGMP

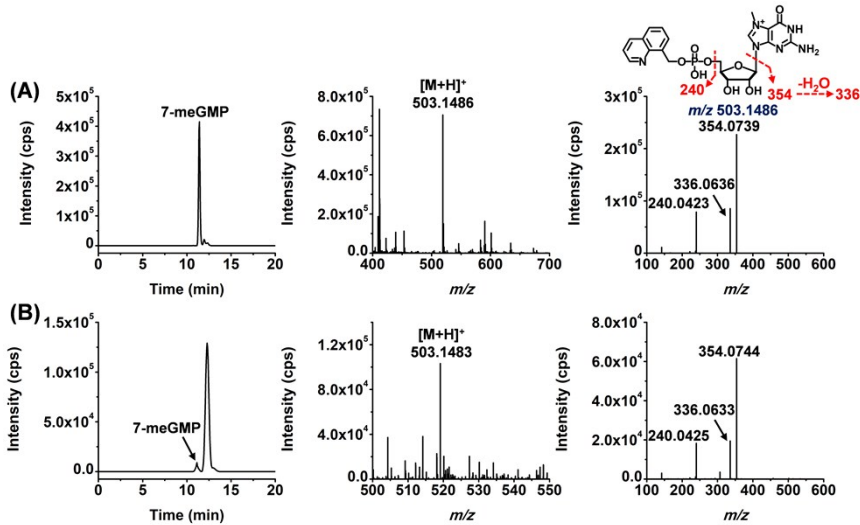

## 21. IDP

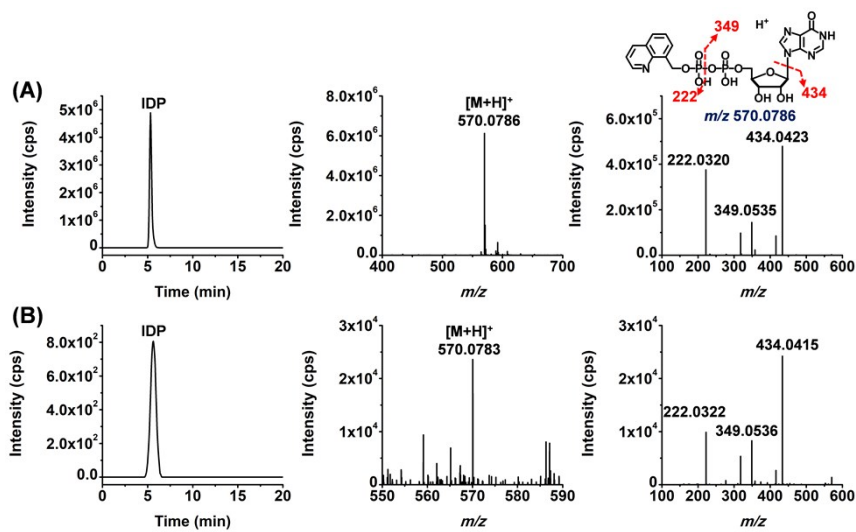

## 22. IMP

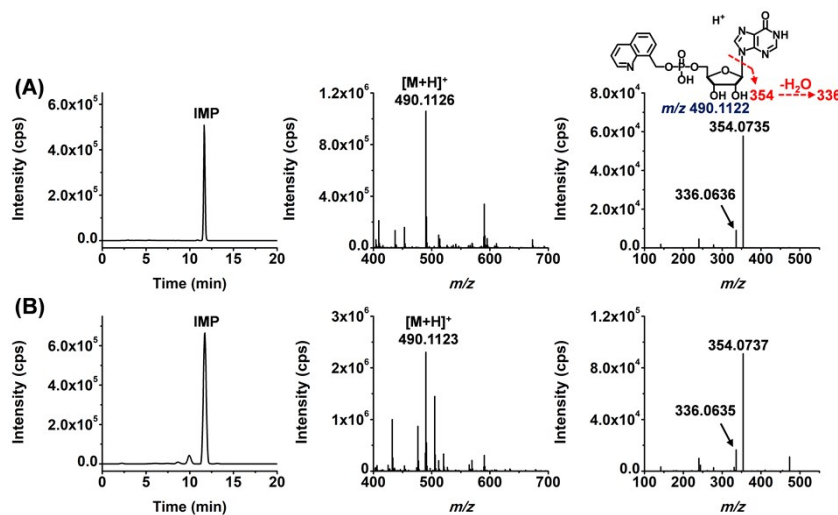

## 23. XDP

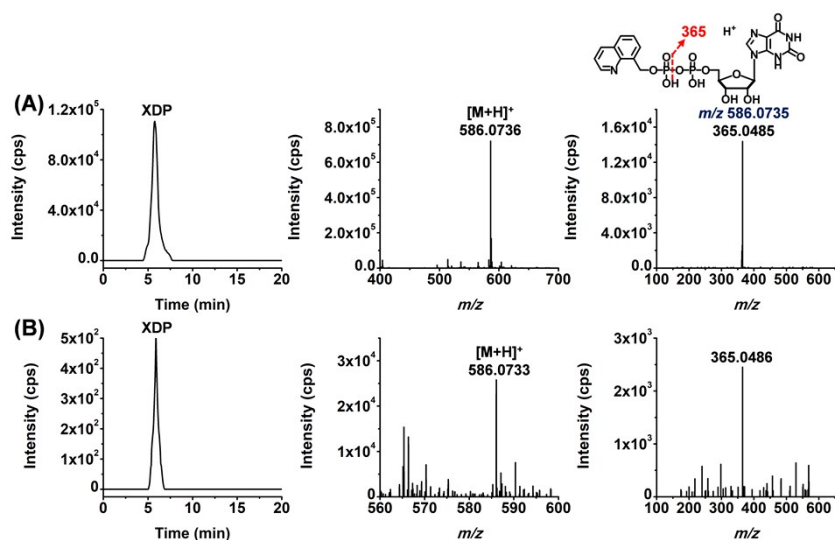

## 24. XMP

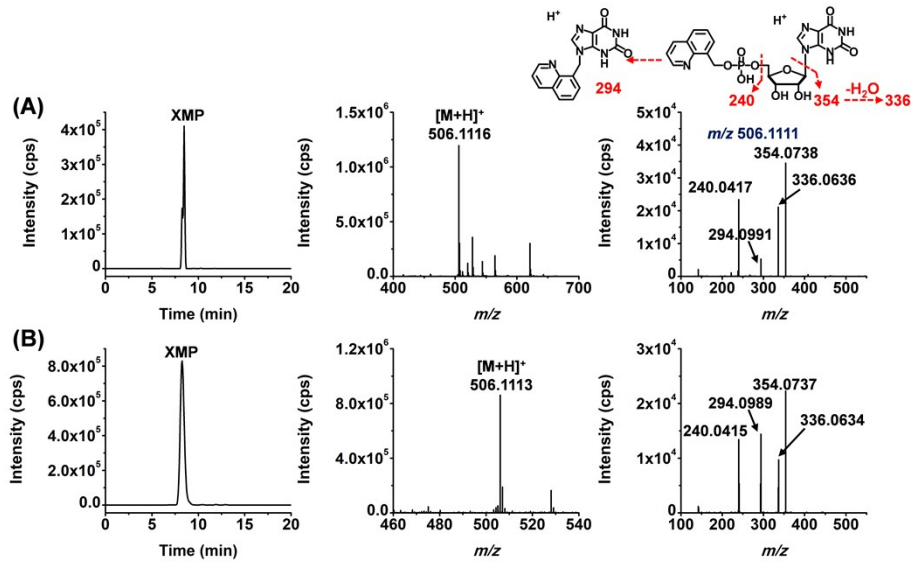

## 25. N<sup>1</sup>-meADP

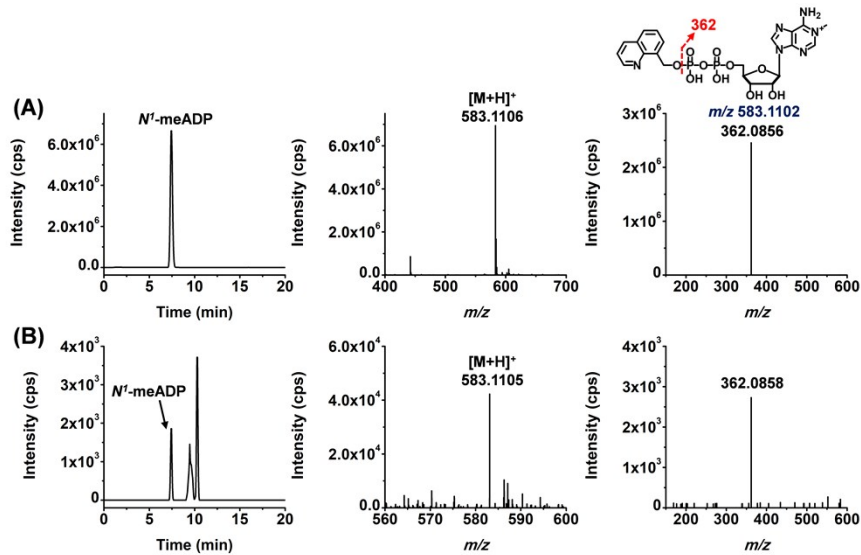

## 26. N<sup>1</sup>-meAMP

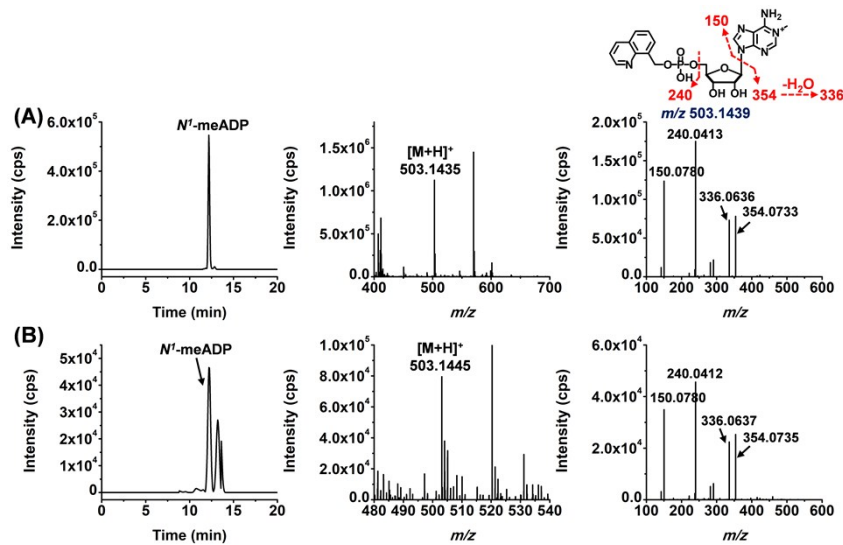

27. 2-S-UDP

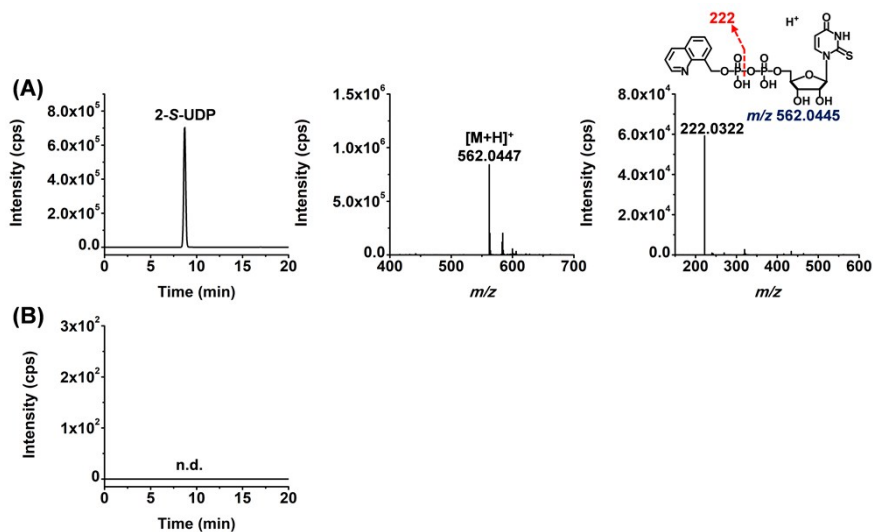

28. 2-S-UMP

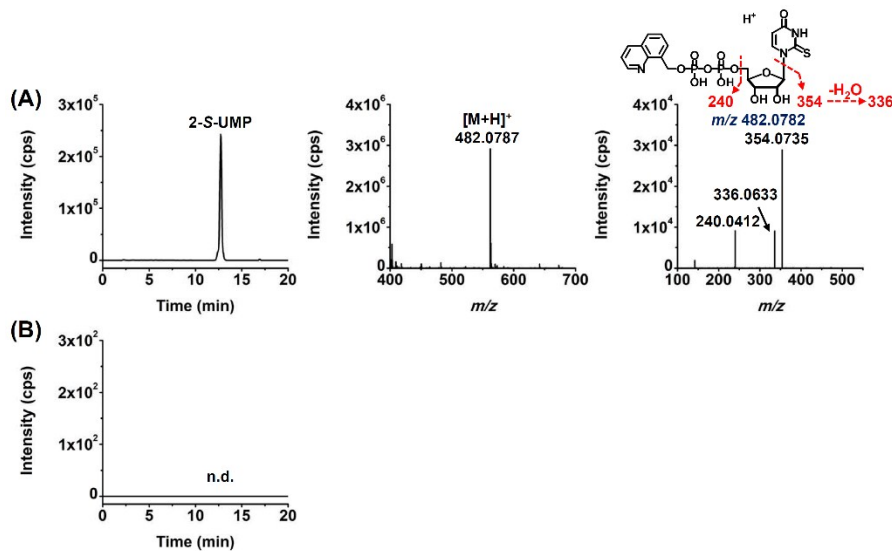

29. 5-meCDP

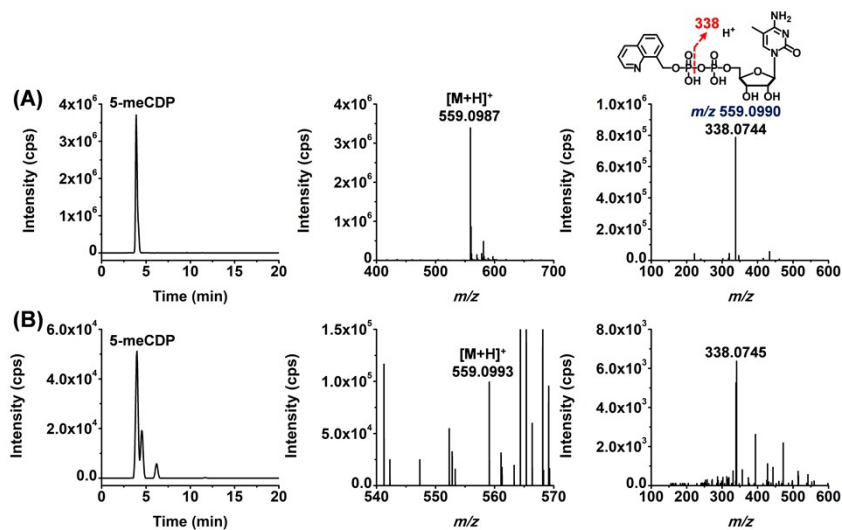

### 30. 5-meCMP

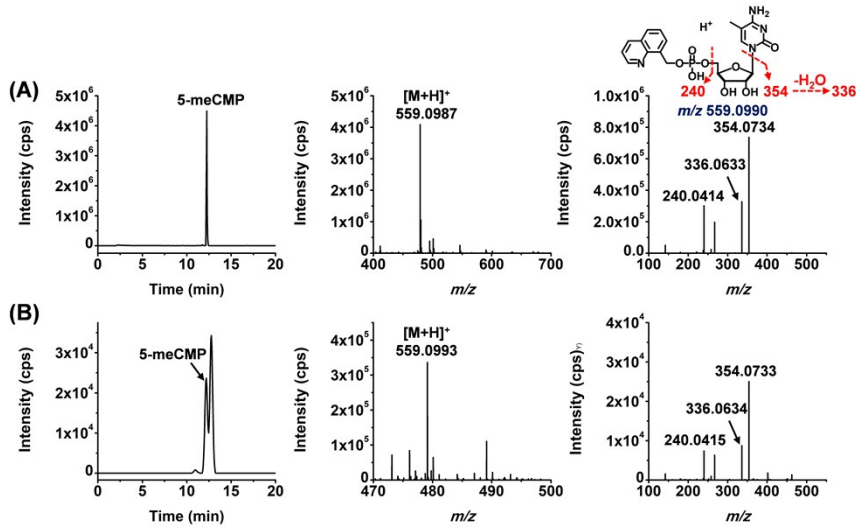

### 31. 5-medCDP

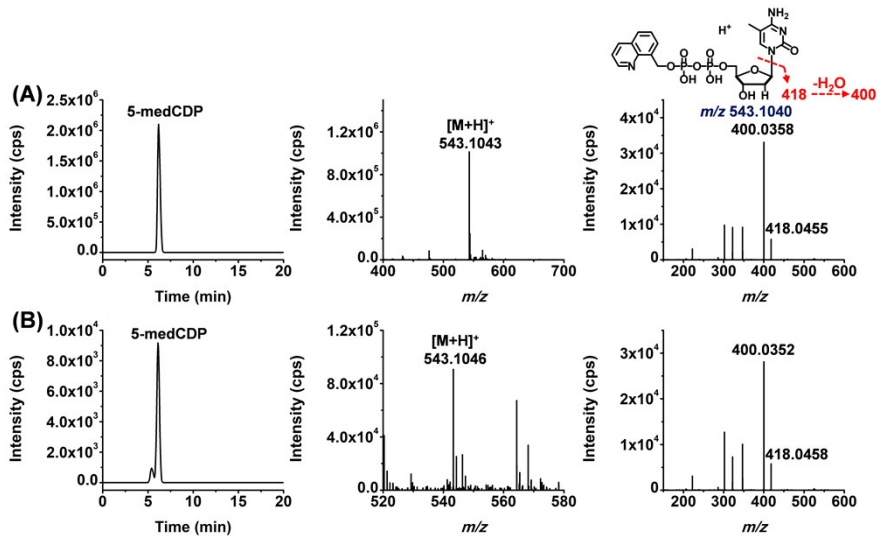

### 32. 5-medCMP

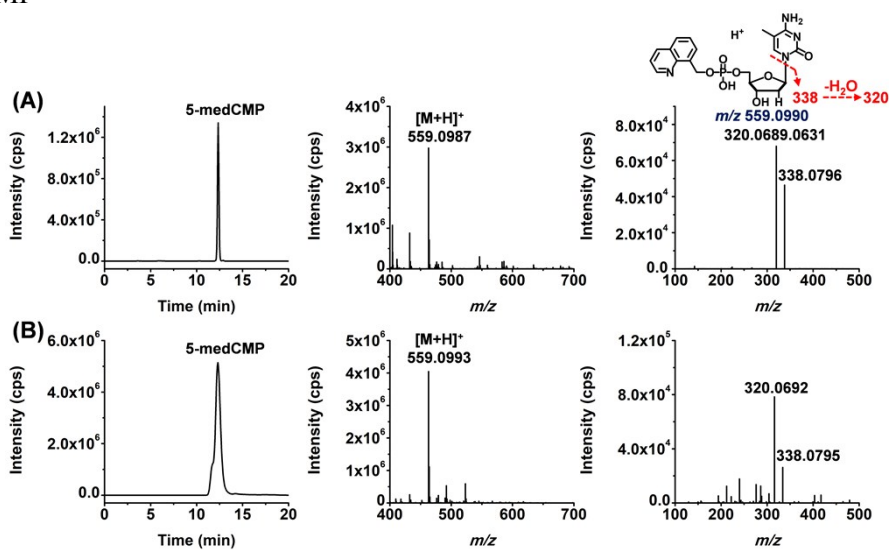



### 33. 5-hmCDP

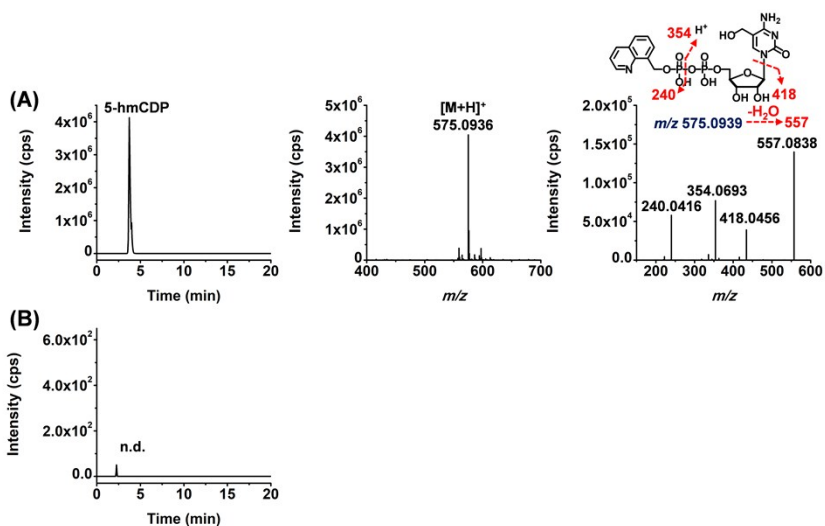

### 34. 5-hmCMP

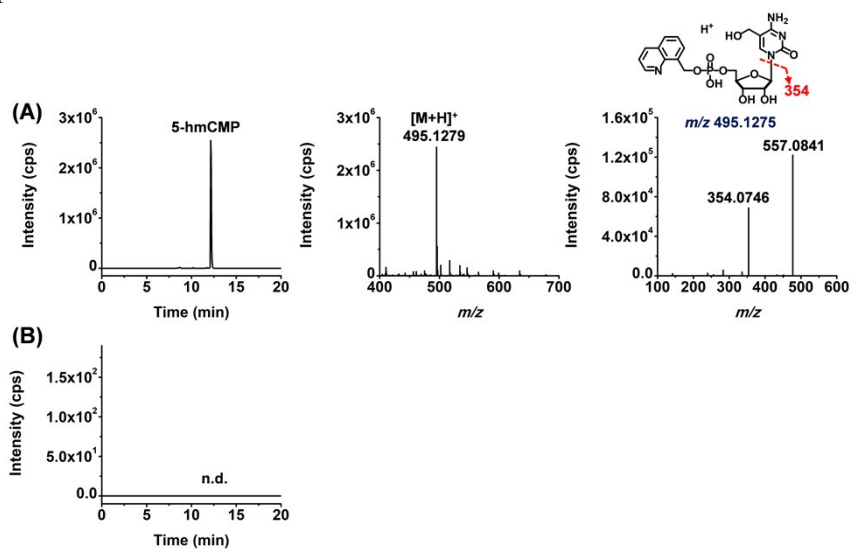

### 35. 5-hmdCDP

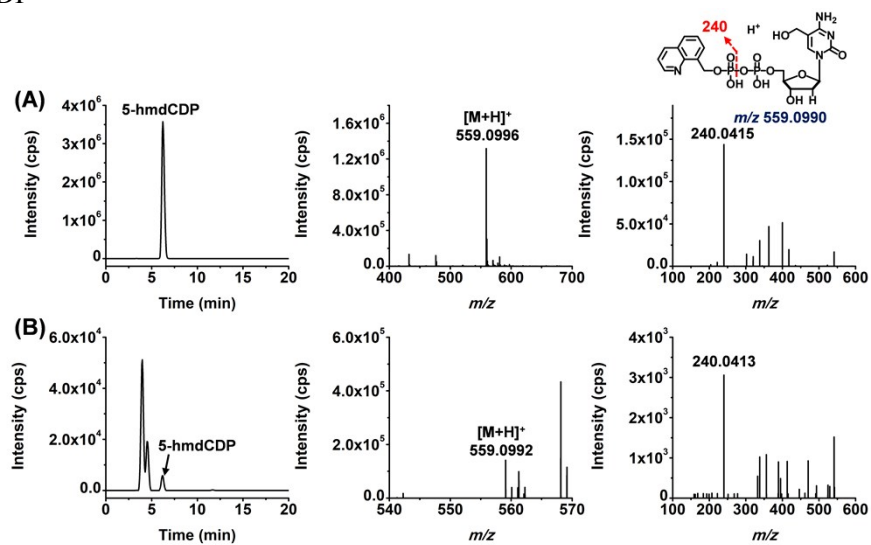

### 36. 5-hmdCMP

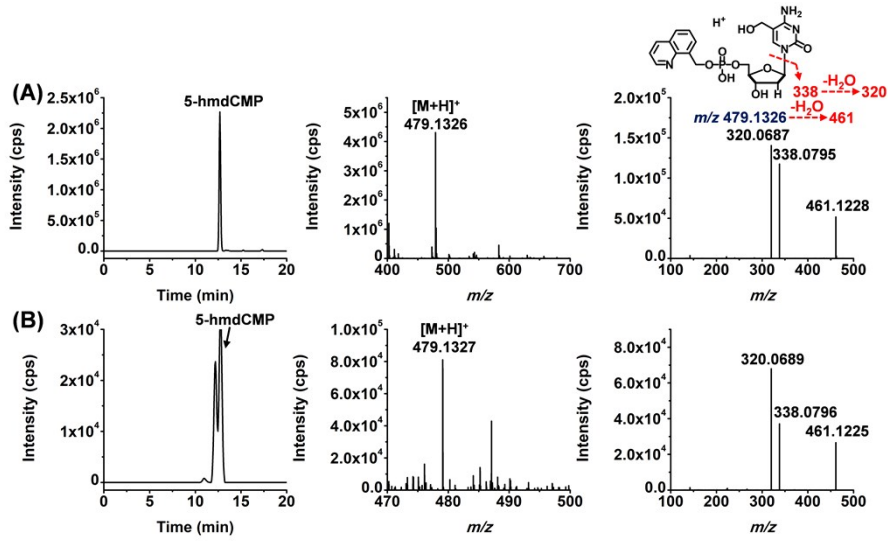

### 37. 2'-O-meADP

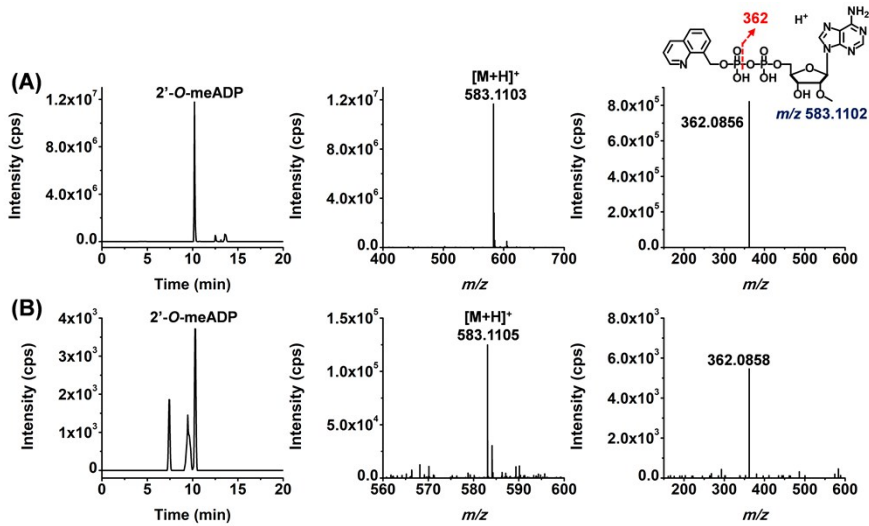

### 38. 2'-O-meAMP

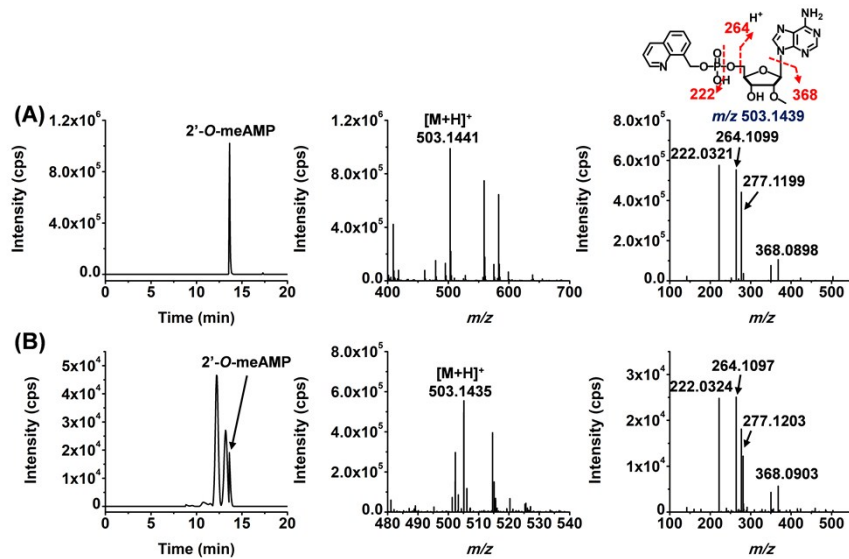

### 39. 2'-O-meGDP

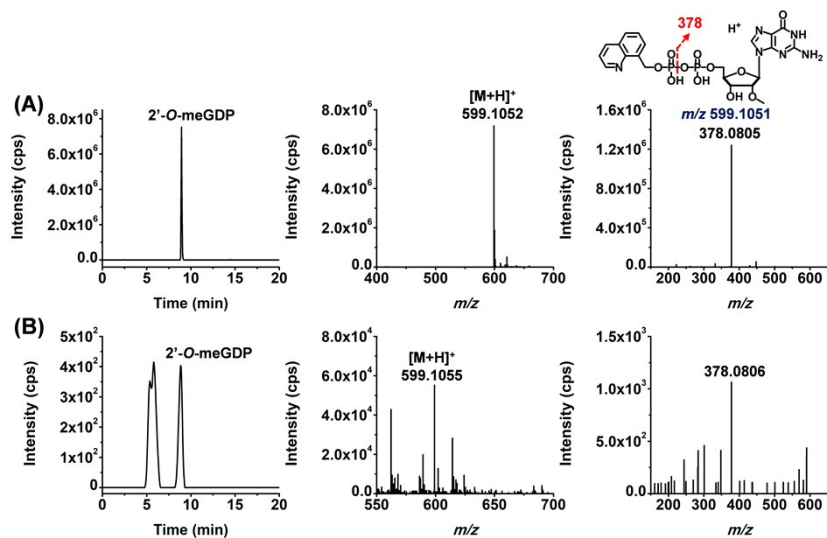

### 40. 2'-O-meGMP

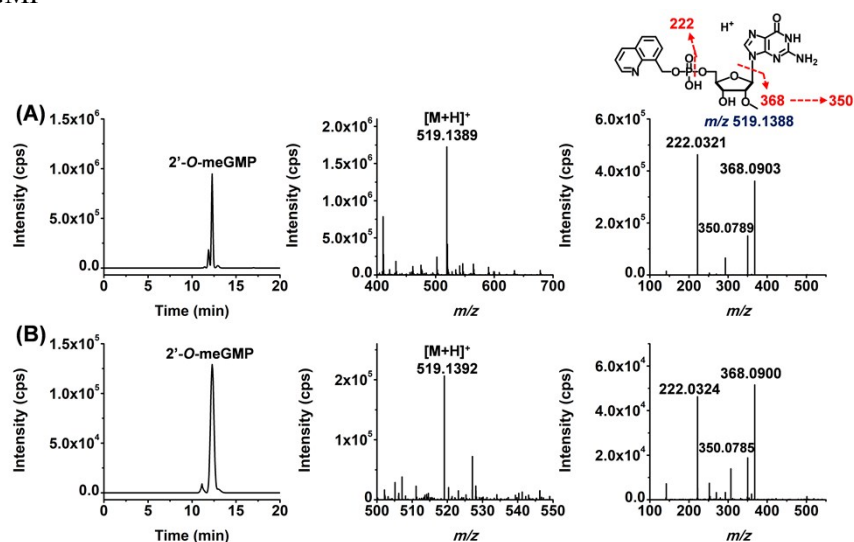

## Reference

1. M. Uhrova, Z. Deyl and M. Suchanek, *J Chromatogr B*, 1996, 681, 99-105.
2. M. L. Tassotto and C. K. Mathews, *J Biol Chem*, 2002, 277, 15807-15812.
3. H. T. Feng, N. Wong, S. Wee and M. M. Lee, *J Chromatogr B*, 2008, 870, 131-134.
4. R. M. Seifar, C. Ras, J. C. van Dam, W. M. van Gulik, J. J. Heijnen and W. A. van Winden, *Anal Biochem*, 2009, 388, 213-219.
5. N. Yamaoka, Y. Kudo, K. Inazawa, S. Inagawa, M. Yasuda, K.-i. Mawatari, K. Nakagomi and K. Kaneko, *J Chromatogr B*, 2010, 878, 2054-2060.
6. O. Magdenoska, J. Martinussen, J. Thykaer and K. F. Nielsen, *Anal Biochem*, 2013, 440, 166-177.
7. L. Wu, L. Chen, J. N. Selvaraj, Y. Wei, Y. Wang, Y. Li, J. Zhao and X. Xue, *Food Chem*, 2015, 173, 1111-1118.
8. M. Ishimaru, M. Haraoka, H. Hatate and R. Tanaka, *Food Anal Methods*, 2016, 9, 1606-1615.
9. J. Y. Puy, L. P. Jordheim, E. Cros-Perrial, C. Dumontet, S. Peyrottes and I. Lefebvre-Tournier, *J Chromatogr B*, 2017, 1053, 101-110.
10. P. Fedorov, R. Grabic, G. Fedorova, J. Cosson, S. Boryshpolets and B. Dzyuba, *Czech J Anim Sci*, 2017, 62, 67-74.
